# Supplementary material for: Serum lipidomics as diagnostic potential for metabolic-associated hepatocellular carcinoma
Source: Research Square preprint supplement (doi:10.21203/rs.3.rs-140974/v1), 2021-01-18

A  
The most active and suppressed reactions among lipid classes between MAFLD-HCC and CTRL

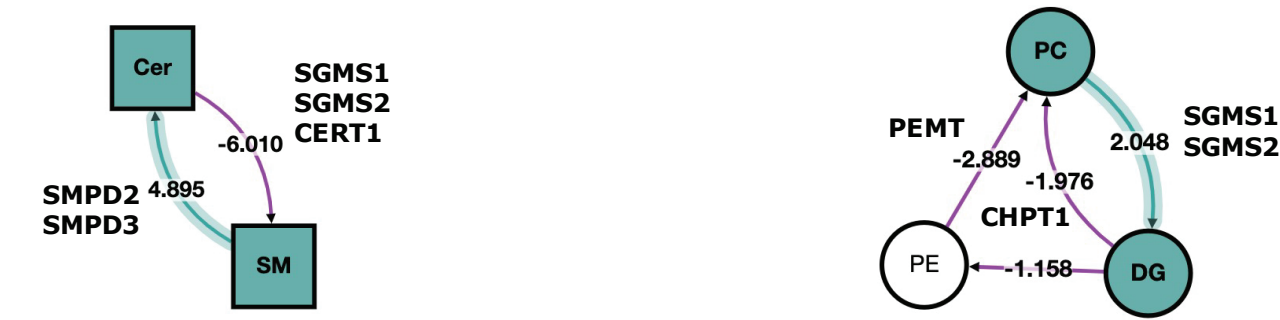

B  
The most active and suppressed reactions among lipid classes between MAFLD-HCC and OB-MAFLD

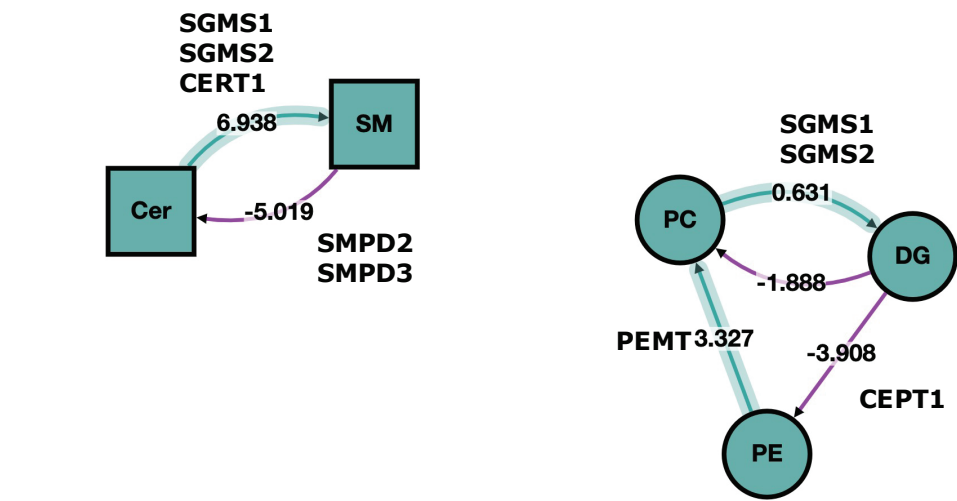

C  
The most active and suppressed reactions among lipid classes between MAFLD-HCC and AV-HCC

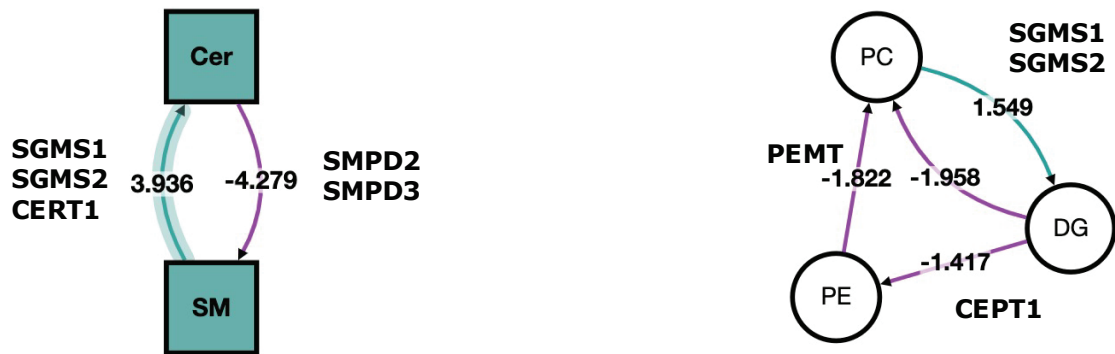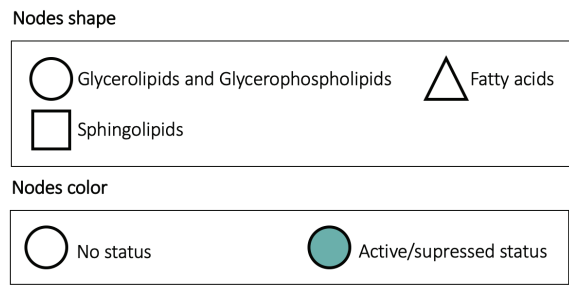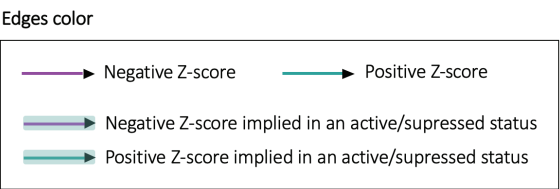

Supplement: Supplementary file 1 [file 3c5b0251025a1752cece3ea4.pdf]
