# Supplementary material for: Serum lipidomics as diagnostic potential for metabolic-associated hepatocellular carcinoma
Source: Research Square preprint supplement (doi:10.21203/rs.3.rs-140974/v1), 2021-01-18
Supplement: Supplementary file 2 [file c19c6aa77b8d01510b712659.xlsx]

## Sheet: Supp. Tab. 1
Supp. Table 1 A					Supp. Table 1B							Supp. Table 1C
Metabolite name	Metabolic class	FDR (q val)	Log2 FC (MAFLD-HCC/CTRL)		Pathways downregulated in MAFLD-HCC compared to CTRL							Pathways upregulated in MAFLD-HCC compared to CTRL
PUFA(14:2n-x)	PUFA	9.71923e-13	-2.97098		pathway_name	pathway_source	num_overlapping_metabolites	overlapping_metabolites	num_all_pathway_metabolites	P_metabolites		pathway_name	pathway_source	num_overlapping_metabolites	overlapping_metabolites	num_all_pathway_metabolites	P_metabolites
MUFA(14:1n-x)	MUFA	4.57317e-10	-2.69196		Linoleic acid metabolism - Homo sapiens (human)	KEGG	6	HMDB08147#HMDB07982#HMDB08039#HMDB08048;HMDB03073;HMDB01043;HMDB04705;HMDB04704;HMDB00673	6 (28)	0.00319		Cholesterol metabolism - Homo sapiens (human)	KEGG	6	HMDB00036;HMDB00637;HMDB00951;HMDB05393;HMDB00658#HMDB06731;HMDB00138	6 (10)	9.01e-05
PUFA(16:3n-x)	PUFA	9.96346e-12	-2.19211		Alpha Linolenic Acid and Linoleic Acid Metabolism	SMPDB	9	HMDB06547;HMDB02226;HMDB08147#HMDB07982#HMDB08039#HMDB08048;HMDB03073;HMDB06528;HMDB01043;HMDB01976;HMDB00673;HMDB02183	11 (18)	0.00337		Metabolism of lipids	Reactome	13	HMDB00036;HMDB00637;HMDB00951;HMDB09012#HMDB08937#HMDB09451#HMDB08946#HMDB08927;HMDB10379#HMDB10397;HMDB04952#HMDB04951#HMDB04957;HMDB04974;HMDB00148;HMDB07958#HMDB07972#HMDB00564#HMDB08056#HMDB07984#HMDB08038#HMDB07940#HMDB07866;HMDB12096;HMDB05393;HMDB00658#HMDB06731;HMDB00138	31 (620)	0.00139
9,10-DiHOME	oxFA	2.46561e-07	-1.95684		Biosynthesis of unsaturated fatty acids - Homo sapiens (human)	KEGG	10	HMDB02368;HMDB00220;HMDB02226;HMDB00827;HMDB03073;HMDB06528;HMDB01043;HMDB00673;HMDB00207;HMDB02183	13 (55)	0.00401		Immune System	Reactome	5	HMDB04952#HMDB04951#HMDB04957;HMDB00658#HMDB06731;HMDB09012#HMDB08937#HMDB09451#HMDB08946#HMDB08927;HMDB05393;HMDB07958#HMDB07972#HMDB00564#HMDB08056#HMDB07984#HMDB08038#HMDB07940#HMDB07866	6 (136)	0.00258
AC(14:2n-x)	AC	1.86058e-11	-1.89621		Fatty acid metabolism	Reactome	10	HMDB12108#HMDB10381#HMDB10384#HMDB10404#HMDB10395#HMDB10407#HMDB10390#HMDB10382#HMDB13122;HMDB00220;HMDB12535;HMDB00222;HMDB08147#HMDB07982#HMDB08039#HMDB08048;HMDB06528;HMDB01043;HMDB01976;HMDB00673;HMDB02183	13 (367)	0.00401		Glycerophospholipid metabolism	EHMN	5	HMDB10379#HMDB10397;HMDB00658#HMDB06731;HMDB09012#HMDB08937#HMDB09451#HMDB08946#HMDB08927;HMDB05393;HMDB07958#HMDB07972#HMDB00564#HMDB08056#HMDB07984#HMDB08038#HMDB07940#HMDB07866	6 (96)	0.00258
androsterone sulfate + etiocholanolone sulfate	ST	1.26275e-07	-1.81018		G alpha (i) signalling events	Reactome	9	HMDB12108#HMDB10381#HMDB10384#HMDB10404#HMDB10395#HMDB10407#HMDB10390#HMDB10382#HMDB13122;HMDB00220;HMDB00827;HMDB08147#HMDB07982#HMDB08039#HMDB08048;HMDB00207;HMDB00277;HMDB01043;HMDB00673;HMDB06726#HMDB06733	12 (159)	0.00965		Vesicle-mediated transport	Reactome	4	HMDB10379#HMDB10397;HMDB00658#HMDB06731;HMDB05393;HMDB07958#HMDB07972#HMDB00564#HMDB08056#HMDB07984#HMDB08038#HMDB07940#HMDB07866	4 (66)	0.00262
MUFA(16:1n-9)	MUFA	3.47612e-07	-1.67409		Metabolism of lipids	Reactome	17	HMDB12108#HMDB10381#HMDB10384#HMDB10404#HMDB10395#HMDB10407#HMDB10390#HMDB10382#HMDB13122;HMDB00626;HMDB10168#HMDB12103#HMDB10169#HMDB12105#HMDB01348;HMDB00220;HMDB12535;HMDB00827;HMDB00222;HMDB00063;HMDB00277;HMDB06528;HMDB01043;HMDB01976;HMDB00673;HMDB08147#HMDB07982#HMDB08039#HMDB08048;HMDB06726#HMDB06733;HMDB01032#HMDB02759;HMDB02183	31 (620)	0.0235		Membrane Trafficking	Reactome	4	HMDB10379#HMDB10397;HMDB00658#HMDB06731;HMDB05393;HMDB07958#HMDB07972#HMDB00564#HMDB08056#HMDB07984#HMDB08038#HMDB07940#HMDB07866	4 (30)	0.00262
x-HODE	oxFA	1.60701e-10	-1.67242		Linoleate metabolism	EHMN	4	HMDB03073;HMDB12108#HMDB10381#HMDB10384#HMDB10404#HMDB10395#HMDB10407#HMDB10390#HMDB10382#HMDB13122;HMDB00673;HMDB08147#HMDB07982#HMDB08039#HMDB08048	4 (24)	0.0242		Plasma lipoprotein assembly_ remodeling_ and clearance	Reactome	4	HMDB10379#HMDB10397;HMDB00658#HMDB06731;HMDB05393;HMDB07958#HMDB07972#HMDB00564#HMDB08056#HMDB07984#HMDB08038#HMDB07940#HMDB07866	4 (25)	0.00262
DG(36:4)	DG	4.1209e-06	-1.65998		Arachidonic acid metabolism	Wikipathways	4	HMDB12108#HMDB10381#HMDB10384#HMDB10404#HMDB10395#HMDB10407#HMDB10390#HMDB10382#HMDB13122;HMDB12535;HMDB01043;HMDB08147#HMDB07982#HMDB08039#HMDB08048	4 (107)	0.0242		Glycerophospholipid biosynthesis	Reactome	4	HMDB10379#HMDB10397;HMDB09012#HMDB08937#HMDB09451#HMDB08946#HMDB08927;HMDB05393;HMDB07958#HMDB07972#HMDB00564#HMDB08056#HMDB07984#HMDB08038#HMDB07940#HMDB07866	4 (93)	0.00262
AC(10:0)	AC	1.3402e-08	-1.60416		Signal Transduction	Reactome	16	HMDB12108#HMDB10381#HMDB10384#HMDB10404#HMDB10395#HMDB10407#HMDB10390#HMDB10382#HMDB13122;HMDB00626;HMDB10168#HMDB12103#HMDB10169#HMDB12105#HMDB01348;HMDB00220;HMDB02226;HMDB00222;HMDB00827;HMDB00207;HMDB00277;HMDB06528;HMDB01043;HMDB03073;HMDB00673;HMDB08147#HMDB07982#HMDB08039#HMDB08048;HMDB06726#HMDB06733;HMDB02183	29 (271)	0.0294		Phospholipid metabolism	Reactome	4	HMDB10379#HMDB10397;HMDB09012#HMDB08937#HMDB09451#HMDB08946#HMDB08927;HMDB05393;HMDB07958#HMDB07972#HMDB00564#HMDB08056#HMDB07984#HMDB08038#HMDB07940#HMDB07866	4 (103)	0.00262
isomer androsterone sulfate	ST	7.06251e-08	-1.58493		Retinoid metabolism and transport	Reactome	5	HMDB00207;HMDB00673;HMDB06726#HMDB06733;HMDB00827;HMDB00220	6 (35)	0.0376		HDL remodeling	Reactome	4	HMDB10379#HMDB10397;HMDB00658#HMDB06731;HMDB05393;HMDB07958#HMDB07972#HMDB00564#HMDB08056#HMDB07984#HMDB08038#HMDB07940#HMDB07866	4 (17)	0.00262
PUFA(16:3n-x)	PUFA	4.2932e-06	-1.50281		Metabolism of fat-soluble vitamins	Reactome	5	HMDB00207;HMDB00673;HMDB06726#HMDB06733;HMDB00827;HMDB00220	6 (41)	0.0376		Plasma lipoprotein remodeling	Reactome	4	HMDB10379#HMDB10397;HMDB00658#HMDB06731;HMDB05393;HMDB07958#HMDB07972#HMDB00564#HMDB08056#HMDB07984#HMDB08038#HMDB07940#HMDB07866	4 (20)	0.00262
isomer pregn-5-ene-3,20-diol sulfate	ST	1.96615e-08	-1.49838		Signaling by GPCR	Reactome	14	HMDB12108#HMDB10381#HMDB10384#HMDB10404#HMDB10395#HMDB10407#HMDB10390#HMDB10382#HMDB13122;HMDB00626;HMDB00207;HMDB00220;HMDB02226;HMDB00827;HMDB03073;HMDB00277;HMDB06528;HMDB01043;HMDB00673;HMDB08147#HMDB07982#HMDB08039#HMDB08048;HMDB06726#HMDB06733;HMDB02183	25 (213)	0.0425		Glycerophospholipid biosynthesis	Wikipathways	4	HMDB10379#HMDB10397;HMDB05393;HMDB09012#HMDB08937#HMDB09451#HMDB08946#HMDB08927;HMDB07958#HMDB07972#HMDB00564#HMDB08056#HMDB07984#HMDB08038#HMDB07940#HMDB07866	4 (94)	0.00262
AC(18:2n-6)	AC	2.13425e-13	-1.47923		GPCR downstream signalling	Reactome	14	HMDB12108#HMDB10381#HMDB10384#HMDB10404#HMDB10395#HMDB10407#HMDB10390#HMDB10382#HMDB13122;HMDB00626;HMDB00207;HMDB00220;HMDB02226;HMDB00827;HMDB03073;HMDB00277;HMDB06528;HMDB01043;HMDB00673;HMDB08147#HMDB07982#HMDB08039#HMDB08048;HMDB06726#HMDB06733;HMDB02183	25 (209)	0.0425		Plasma lipoprotein assembly_ remodeling_ and clearance	Wikipathways	4	HMDB10379#HMDB10397;HMDB00658#HMDB06731;HMDB05393;HMDB07958#HMDB07972#HMDB00564#HMDB08056#HMDB07984#HMDB08038#HMDB07940#HMDB07866	4 (21)	0.00262
PUFA(18:4n-3)	PUFA	0.0376844	-1.444		sphingosine and sphingosine-1-phosphate metabolism	HumanCyc	8	HMDB00220;HMDB00827;HMDB03073;HMDB00277;HMDB01043;HMDB00673;HMDB00207;HMDB02183	12 (59)	0.0462		Digestion of dietary lipid	Reactome	6	HMDB00036;HMDB00637;HMDB00951;HMDB05393;HMDB00658#HMDB06731;HMDB00138	9 (17)	0.00478
12(S)-HHTrE	oxFA	0.00164408	-1.43406		retinol biosynthesis	HumanCyc	7	HMDB00220;HMDB00827;HMDB03073;HMDB01043;HMDB00673;HMDB00207;HMDB02183	10 (37)	0.0465		Digestion	Reactome	6	HMDB00036;HMDB00637;HMDB00951;HMDB05393;HMDB00658#HMDB06731;HMDB00138	9 (43)	0.00478
LPC(O-22:2)	LPC	1.3228e-06	-1.40907		fatty acid activation	HumanCyc	7	HMDB00220;HMDB00827;HMDB03073;HMDB01043;HMDB00673;HMDB00207;HMDB02183	10 (38)	0.0465		Digestion and absorption	Reactome	6	HMDB00036;HMDB00637;HMDB00951;HMDB05393;HMDB00658#HMDB06731;HMDB00138	9 (46)	0.00478
PC(P-20:2/0:0)	LPC	5.72741e-05	-1.35857									Digestion	Wikipathways	6	HMDB00036;HMDB00637;HMDB00951;HMDB05393;HMDB00658#HMDB06731;HMDB00138	9 (43)	0.00478
PE(P-18:2/0:0)	LPE	1.0255e-06	-1.32703									Metabolism	Reactome	15	HMDB00036;HMDB00637;HMDB00951;HMDB00510;HMDB09012#HMDB08937#HMDB09451#HMDB08946#HMDB08927;HMDB10379#HMDB10397;HMDB04952#HMDB04951#HMDB04957;HMDB00826;HMDB04974;HMDB00148;HMDB07958#HMDB07972#HMDB00564#HMDB08056#HMDB07984#HMDB08038#HMDB07940#HMDB07866;HMDB05393;HMDB00658#HMDB06731;HMDB12096;HMDB00138	45 (1384)	0.00489
PC(O-20:2/0:0)	LPC	3.4062e-06	-1.32226									MTHFR deficiency	Wikipathways	4	HMDB04952#HMDB04951#HMDB04957;HMDB12096;HMDB09012#HMDB08937#HMDB09451#HMDB08946#HMDB08927;HMDB07958#HMDB07972#HMDB00564#HMDB08056#HMDB07984#HMDB08038#HMDB07940#HMDB07866	5 (20)	0.0111
PUFA(16:2n-4,7)	PUFA	5.31482e-10	-1.31784									bile acid biosynthesis_ neutral pathway	HumanCyc	4	HMDB00036;HMDB00637;HMDB00951;HMDB00138	5 (44)	0.0111
Deoxycholic acid	BA	0.0332544	-1.29375									Sphingolipid Metabolism	SMPDB	4	HMDB04952#HMDB04951#HMDB04957;HMDB04974;HMDB12096;HMDB07958#HMDB07972#HMDB00564#HMDB08056#HMDB07984#HMDB08038#HMDB07940#HMDB07866	5 (40)	0.0111
PUFA(18:2n-6)	PUFA	7.85978e-10	-1.26317									Gaucher Disease	SMPDB	4	HMDB04952#HMDB04951#HMDB04957;HMDB04974;HMDB12096;HMDB07958#HMDB07972#HMDB00564#HMDB08056#HMDB07984#HMDB08038#HMDB07940#HMDB07866	5 (40)	0.0111
PUFA(22:5n-6)	PUFA	6.87101e-11	-1.23186									Globoid Cell Leukodystrophy	SMPDB	4	HMDB04952#HMDB04951#HMDB04957;HMDB04974;HMDB12096;HMDB07958#HMDB07972#HMDB00564#HMDB08056#HMDB07984#HMDB08038#HMDB07940#HMDB07866	5 (40)	0.0111
PC(O-24:2/0:0)	LPC	1.03348e-05	-1.19766									Metachromatic Leukodystrophy (MLD)	SMPDB	4	HMDB04952#HMDB04951#HMDB04957;HMDB04974;HMDB12096;HMDB07958#HMDB07972#HMDB00564#HMDB08056#HMDB07984#HMDB08038#HMDB07940#HMDB07866	5 (40)	0.0111
Dehydroepiandrosterone sulfate (DHEAS)	ST	2.3547e-06	-1.19387									Fabry disease	SMPDB	4	HMDB04952#HMDB04951#HMDB04957;HMDB04974;HMDB12096;HMDB07958#HMDB07972#HMDB00564#HMDB08056#HMDB07984#HMDB08038#HMDB07940#HMDB07866	5 (40)	0.0111
AC(18:1n-9)	AC	3.5871e-06	-1.0976									Krabbe disease	SMPDB	4	HMDB04952#HMDB04951#HMDB04957;HMDB04974;HMDB12096;HMDB07958#HMDB07972#HMDB00564#HMDB08056#HMDB07984#HMDB08038#HMDB07940#HMDB07866	5 (40)	0.0111
PC(0:0/20:0)	LPC	1.02095e-07	-1.07926									Oligodendrocyte Specification and differentiation(including remyelination)_ leading to Myelin Components for CNS	Wikipathways	3	HMDB12096;HMDB09012#HMDB08937#HMDB09451#HMDB08946#HMDB08927;HMDB07958#HMDB07972#HMDB00564#HMDB08056#HMDB07984#HMDB08038#HMDB07940#HMDB07866	3 (11)	0.0126
PUFA(22:6n-3)	PUFA	1.2747e-07	-1.05773									Acyl chain remodeling of CL	Reactome	3	HMDB10379#HMDB10397;HMDB09012#HMDB08937#HMDB09451#HMDB08946#HMDB08927;HMDB07958#HMDB07972#HMDB00564#HMDB08056#HMDB07984#HMDB08038#HMDB07940#HMDB07866	3 (12)	0.0126
PC(20:0/0:0)	LPC	6.00416e-08	-1.05473									Glycerophospholipid metabolism - Homo sapiens (human)	KEGG	3	HMDB10379#HMDB10397;HMDB09012#HMDB08937#HMDB09451#HMDB08946#HMDB08927;HMDB07958#HMDB07972#HMDB00564#HMDB08056#HMDB07984#HMDB08038#HMDB07940#HMDB07866	3 (52)	0.0126
x-OxoODE	oxFA	0.000124846	-1.05191									Phospholipid Biosynthesis	SMPDB	3	HMDB10379#HMDB10397;HMDB09012#HMDB08937#HMDB09451#HMDB08946#HMDB08927;HMDB07958#HMDB07972#HMDB00564#HMDB08056#HMDB07984#HMDB08038#HMDB07940#HMDB07866	3 (24)	0.0126
isomer Dehydroepiandrosterone sulfate (DHEAS)	ST	2.3812e-06	-1.04689									Sphingolipid metabolism	Wikipathways	5	HMDB04952#HMDB04951#HMDB04957;HMDB04974;HMDB12096;HMDB09012#HMDB08937#HMDB09451#HMDB08946#HMDB08927;HMDB07958#HMDB07972#HMDB00564#HMDB08056#HMDB07984#HMDB08038#HMDB07940#HMDB07866	8 (67)	0.0173
LPC(22:0)	LPC	2.58862e-08	-0.983604									Transport of small molecules	Reactome	10	HMDB00036;HMDB10379#HMDB10397;HMDB00951;HMDB09012#HMDB08937#HMDB09451#HMDB08946#HMDB08927;HMDB12096;HMDB00148;HMDB07958#HMDB07972#HMDB00564#HMDB08056#HMDB07984#HMDB08038#HMDB07940#HMDB07866;HMDB05393;HMDB00658#HMDB06731;HMDB00138	26 (226)	0.0312
Pregnenolone sulfate	ST	1.02408e-05	-0.968139									G alpha (i) signalling events	Reactome	6	HMDB10379#HMDB10397;HMDB09012#HMDB08937#HMDB09451#HMDB08946#HMDB08927;HMDB00148;HMDB07958#HMDB07972#HMDB00564#HMDB08056#HMDB07984#HMDB08038#HMDB07940#HMDB07866;HMDB05393;HMDB00658#HMDB06731	12 (159)	0.0326
PUFA(20:4n-6)	PUFA	3.40248e-12	-0.953322									Sphingolipid metabolism	Reactome	5	HMDB04952#HMDB04951#HMDB04957;HMDB04974;HMDB12096;HMDB09012#HMDB08937#HMDB09451#HMDB08946#HMDB08927;HMDB07958#HMDB07972#HMDB00564#HMDB08056#HMDB07984#HMDB08038#HMDB07940#HMDB07866	9 (68)	0.033
12-HETE	oxFA	0.030742	-0.951217									Developmental Biology	Reactome	3	HMDB04952#HMDB04951#HMDB04957;HMDB00148;HMDB05393	4 (26)	0.0427
PC(O-18:1/18:2)	PC	7.49855e-08	-0.950752									Naproxen Action Pathway	SMPDB	3	HMDB10379#HMDB10397;HMDB00148;HMDB07958#HMDB07972#HMDB00564#HMDB08056#HMDB07984#HMDB08038#HMDB07940#HMDB07866	4 (72)	0.0427
22:3n-x	PUFA	0.00283935	-0.891906									Phenylbutazone Action Pathway	SMPDB	3	HMDB10379#HMDB10397;HMDB00148;HMDB07958#HMDB07972#HMDB00564#HMDB08056#HMDB07984#HMDB08038#HMDB07940#HMDB07866	4 (72)	0.0427
PC(O-20:1/0:0)	LPC	0.000129979	-0.883645									Valdecoxib Action Pathway	SMPDB	3	HMDB10379#HMDB10397;HMDB00148;HMDB07958#HMDB07972#HMDB00564#HMDB08056#HMDB07984#HMDB08038#HMDB07940#HMDB07866	4 (72)	0.0427
PUFA(22:4n-6)	PUFA	0.000158585	-0.8353									Sphingolipid metabolism - Homo sapiens (human)	KEGG	3	HMDB04952#HMDB04951#HMDB04957;HMDB04974;HMDB12096	4 (25)	0.0427
PE(22:6/0:0)	LPE	1.32946e-08	-0.818638									Innate Immune System	Reactome	3	HMDB00658#HMDB06731;HMDB05393;HMDB07958#HMDB07972#HMDB00564#HMDB08056#HMDB07984#HMDB08038#HMDB07940#HMDB07866	4 (99)	0.0427
PE(0:0/20:3)	LPE	4.15452e-05	-0.814606									Retrograde endocannabinoid signaling - Homo sapiens (human)	KEGG	3	HMDB00148;HMDB09012#HMDB08937#HMDB09451#HMDB08946#HMDB08927;HMDB07958#HMDB07972#HMDB00564#HMDB08056#HMDB07984#HMDB08038#HMDB07940#HMDB07866	4 (19)	0.0427
PC(O-22:1/0:0)	LPC	0.000205904	-0.811445									Etodolac Action Pathway	SMPDB	3	HMDB10379#HMDB10397;HMDB00148;HMDB07958#HMDB07972#HMDB00564#HMDB08056#HMDB07984#HMDB08038#HMDB07940#HMDB07866	4 (72)	0.0427
PC(O-18:1/0:0)	LPC	2.6013e-06	-0.808937									Ketoprofen Action Pathway	SMPDB	3	HMDB10379#HMDB10397;HMDB00148;HMDB07958#HMDB07972#HMDB00564#HMDB08056#HMDB07984#HMDB08038#HMDB07940#HMDB07866	4 (72)	0.0427
PC(O-18:2/20:4)	PC	0.00045166	-0.795382									Ibuprofen Action Pathway	SMPDB	3	HMDB10379#HMDB10397;HMDB00148;HMDB07958#HMDB07972#HMDB00564#HMDB08056#HMDB07984#HMDB08038#HMDB07940#HMDB07866	4 (77)	0.0427
PC(19:0/0:0)	LPC	0.000104483	-0.777648									Rofecoxib Action Pathway	SMPDB	3	HMDB10379#HMDB10397;HMDB00148;HMDB07958#HMDB07972#HMDB00564#HMDB08056#HMDB07984#HMDB08038#HMDB07940#HMDB07866	4 (72)	0.0427
Sphingosine-1-phosphate	FSB	2.08866e-10	-0.772848									Acetylsalicylic Acid Action Pathway	SMPDB	3	HMDB10379#HMDB10397;HMDB00148;HMDB07958#HMDB07972#HMDB00564#HMDB08056#HMDB07984#HMDB08038#HMDB07940#HMDB07866	4 (72)	0.0427
PC(0:0/18:2)	LPC	3.68098e-08	-0.770817									Diflunisal Action Pathway	SMPDB	3	HMDB10379#HMDB10397;HMDB00148;HMDB07958#HMDB07972#HMDB00564#HMDB08056#HMDB07984#HMDB08038#HMDB07940#HMDB07866	4 (72)	0.0427
PC(O-24:1/0:0)	LPC	6.4341e-06	-0.770768									Leukotriene C4 Synthesis Deficiency	SMPDB	3	HMDB10379#HMDB10397;HMDB00148;HMDB07958#HMDB07972#HMDB00564#HMDB08056#HMDB07984#HMDB08038#HMDB07940#HMDB07866	4 (71)	0.0427
TG(58:10)	TG	0.0188069	-0.769506									Glycosphingolipid metabolism	Reactome	3	HMDB04952#HMDB04951#HMDB04957;HMDB04974;HMDB12096	4 (41)	0.0427
PE(0:0/18:2)	LPE	2.063e-06	-0.764734									Acetaminophen Action Pathway	SMPDB	3	HMDB10379#HMDB10397;HMDB00148;HMDB07958#HMDB07972#HMDB00564#HMDB08056#HMDB07984#HMDB08038#HMDB07940#HMDB07866	4 (72)	0.0427
PC(O-38:4)	PC	9.91423e-08	-0.749366									Celecoxib Action Pathway	SMPDB	3	HMDB10379#HMDB10397;HMDB00148;HMDB07958#HMDB07972#HMDB00564#HMDB08056#HMDB07984#HMDB08038#HMDB07940#HMDB07866	4 (76)	0.0427
AC(16:0)	AC	7.5834e-06	-0.737576									Sulindac Action Pathway	SMPDB	3	HMDB10379#HMDB10397;HMDB00148;HMDB07958#HMDB07972#HMDB00564#HMDB08056#HMDB07984#HMDB08038#HMDB07940#HMDB07866	4 (72)	0.0427
PUFA(18:3n-6)	PUFA	1.0593e-06	-0.736213									Diclofenac Action Pathway	SMPDB	3	HMDB10379#HMDB10397;HMDB00148;HMDB07958#HMDB07972#HMDB00564#HMDB08056#HMDB07984#HMDB08038#HMDB07940#HMDB07866	4 (72)	0.0427
PI(18:0/20:4)	PI	6.1267e-06	-0.723078									Ketorolac Action Pathway	SMPDB	3	HMDB10379#HMDB10397;HMDB00148;HMDB07958#HMDB07972#HMDB00564#HMDB08056#HMDB07984#HMDB08038#HMDB07940#HMDB07866	4 (72)	0.0427
12,13-DiHOME	oxFA	0.000412647	-0.719433									Etoricoxib Action Pathway	SMPDB	3	HMDB10379#HMDB10397;HMDB00148;HMDB07958#HMDB07972#HMDB00564#HMDB08056#HMDB07984#HMDB08038#HMDB07940#HMDB07866	4 (72)	0.0427
PC(0:0/18:1)	LPC	2.00152e-08	-0.719189									Carprofen Action Pathway	SMPDB	3	HMDB10379#HMDB10397;HMDB00148;HMDB07958#HMDB07972#HMDB00564#HMDB08056#HMDB07984#HMDB08038#HMDB07940#HMDB07866	4 (72)	0.0427
PC(0:0/18:0)	LPC	2.75747e-11	-0.710867									Flurbiprofen Action Pathway	SMPDB	3	HMDB10379#HMDB10397;HMDB00148;HMDB07958#HMDB07972#HMDB00564#HMDB08056#HMDB07984#HMDB08038#HMDB07940#HMDB07866	4 (72)	0.0427
PC(20:1/0:0)	LPC	1.9058e-06	-0.710569									Fenoprofen Action Pathway	SMPDB	3	HMDB10379#HMDB10397;HMDB00148;HMDB07958#HMDB07972#HMDB00564#HMDB08056#HMDB07984#HMDB08038#HMDB07940#HMDB07866	4 (72)	0.0427
x-HODE	oxFA	1.7068e-06	-0.709259									Antrafenine Action Pathway	SMPDB	3	HMDB10379#HMDB10397;HMDB00148;HMDB07958#HMDB07972#HMDB00564#HMDB08056#HMDB07984#HMDB08038#HMDB07940#HMDB07866	4 (71)	0.0427
LPI(20:3)	LPI	0.00055473	-0.693253									Antipyrine Action Pathway	SMPDB	3	HMDB10379#HMDB10397;HMDB00148;HMDB07958#HMDB07972#HMDB00564#HMDB08056#HMDB07984#HMDB08038#HMDB07940#HMDB07866	4 (72)	0.0427
ChoE(22:6)	ChoE	1.01232e-05	-0.669987									Lumiracoxib Action Pathway	SMPDB	3	HMDB10379#HMDB10397;HMDB00148;HMDB07958#HMDB07972#HMDB00564#HMDB08056#HMDB07984#HMDB08038#HMDB07940#HMDB07866	4 (72)	0.0427
PC(O-18:1/22:4)	PC	2.18209e-09	-0.668748									Magnesium salicylate Action Pathway	SMPDB	3	HMDB10379#HMDB10397;HMDB00148;HMDB07958#HMDB07972#HMDB00564#HMDB08056#HMDB07984#HMDB08038#HMDB07940#HMDB07866	4 (72)	0.0427
isomer androsterone sulfate	ST	0.00264328	-0.668238									Trisalicylate-choline Action Pathway	SMPDB	3	HMDB10379#HMDB10397;HMDB00148;HMDB07958#HMDB07972#HMDB00564#HMDB08056#HMDB07984#HMDB08038#HMDB07940#HMDB07866	4 (71)	0.0427
NAE(18:0)	NAE	1.75985e-07	-0.663846									Nepafenac Action Pathway	SMPDB	3	HMDB10379#HMDB10397;HMDB00148;HMDB07958#HMDB07972#HMDB00564#HMDB08056#HMDB07984#HMDB08038#HMDB07940#HMDB07866	4 (72)	0.0427
PC(P-20:1/0:0)	LPC	0.019188	-0.662665									Lornoxicam Action Pathway	SMPDB	3	HMDB10379#HMDB10397;HMDB00148;HMDB07958#HMDB07972#HMDB00564#HMDB08056#HMDB07984#HMDB08038#HMDB07940#HMDB07866	4 (71)	0.0427
MUFA(18:1n-9)	MUFA	0.000801376	-0.656864									Salsalate Action Pathway	SMPDB	3	HMDB10379#HMDB10397;HMDB00148;HMDB07958#HMDB07972#HMDB00564#HMDB08056#HMDB07984#HMDB08038#HMDB07940#HMDB07866	4 (72)	0.0427
isomer androsterone sulfate	ST	0.00170079	-0.650006									Tenoxicam Action Pathway	SMPDB	3	HMDB10379#HMDB10397;HMDB00148;HMDB07958#HMDB07972#HMDB00564#HMDB08056#HMDB07984#HMDB08038#HMDB07940#HMDB07866	4 (71)	0.0427
NAE(18:1n-9)	NAE	4.9791e-06	-0.6368									Tiaprofenic Acid Action Pathway	SMPDB	3	HMDB10379#HMDB10397;HMDB00148;HMDB07958#HMDB07972#HMDB00564#HMDB08056#HMDB07984#HMDB08038#HMDB07940#HMDB07866	4 (72)	0.0427
PC(0:0/20:4)	LPC	6.02362e-09	-0.636724									Tolmetin Action Pathway	SMPDB	3	HMDB10379#HMDB10397;HMDB00148;HMDB07958#HMDB07972#HMDB00564#HMDB08056#HMDB07984#HMDB08038#HMDB07940#HMDB07866	4 (72)	0.0427
PC(P-18:1/0:0)	LPC	0.00024447	-0.631963									Salicylic Acid Action Pathway	SMPDB	3	HMDB10379#HMDB10397;HMDB00148;HMDB07958#HMDB07972#HMDB00564#HMDB08056#HMDB07984#HMDB08038#HMDB07940#HMDB07866	4 (72)	0.0427
ChoE(20:3)	ChoE	4.1209e-06	-0.627039									Salicylate-sodium Action Pathway	SMPDB	3	HMDB10379#HMDB10397;HMDB00148;HMDB07958#HMDB07972#HMDB00564#HMDB08056#HMDB07984#HMDB08038#HMDB07940#HMDB07866	4 (72)	0.0427
TG(58:9)	TG	0.0139495	-0.624343									Oxaprozin Action Pathway	SMPDB	3	HMDB10379#HMDB10397;HMDB00148;HMDB07958#HMDB07972#HMDB00564#HMDB08056#HMDB07984#HMDB08038#HMDB07940#HMDB07866	4 (72)	0.0427
MUFA(20:1n-6)	MUFA	0.0271947	-0.617116									Nabumetone Action Pathway	SMPDB	3	HMDB10379#HMDB10397;HMDB00148;HMDB07958#HMDB07972#HMDB00564#HMDB08056#HMDB07984#HMDB08038#HMDB07940#HMDB07866	4 (72)	0.0427
PC(17:0/0:0)	LPC	8.45136e-07	-0.615231									Indomethacin Action Pathway	SMPDB	3	HMDB10379#HMDB10397;HMDB00148;HMDB07958#HMDB07972#HMDB00564#HMDB08056#HMDB07984#HMDB08038#HMDB07940#HMDB07866	4 (72)	0.0427
PE(P-20:0/0:0)	LPE	0.00109851	-0.585039									Meloxicam Action Pathway	SMPDB	3	HMDB10379#HMDB10397;HMDB00148;HMDB07958#HMDB07972#HMDB00564#HMDB08056#HMDB07984#HMDB08038#HMDB07940#HMDB07866	4 (72)	0.0427
PC(P-16:0/18:2)	PC	1.5965e-06	-0.572742									Suprofen Action Pathway	SMPDB	3	HMDB10379#HMDB10397;HMDB00148;HMDB07958#HMDB07972#HMDB00564#HMDB08056#HMDB07984#HMDB08038#HMDB07940#HMDB07866	4 (72)	0.0427
MUFA(24:1n-9)	MUFA	0.000415801	-0.565932									Bromfenac Action Pathway	SMPDB	3	HMDB10379#HMDB10397;HMDB00148;HMDB07958#HMDB07972#HMDB00564#HMDB08056#HMDB07984#HMDB08038#HMDB07940#HMDB07866	4 (72)	0.0427
PUFA(22:5n-3)	PUFA	0.0179518	-0.55452									Mefenamic Acid Action Pathway	SMPDB	3	HMDB10379#HMDB10397;HMDB00148;HMDB07958#HMDB07972#HMDB00564#HMDB08056#HMDB07984#HMDB08038#HMDB07940#HMDB07866	4 (72)	0.0427
PI(18:0/20:3)	PI	0.000214724	-0.544553									Arachidonic Acid Metabolism	SMPDB	3	HMDB10379#HMDB10397;HMDB00148;HMDB07958#HMDB07972#HMDB00564#HMDB08056#HMDB07984#HMDB08038#HMDB07940#HMDB07866	4 (71)	0.0427
SM(d18:2/23:0)	SM	2.04466e-05	-0.544228									Piroxicam Action Pathway	SMPDB	3	HMDB10379#HMDB10397;HMDB00148;HMDB07958#HMDB07972#HMDB00564#HMDB08056#HMDB07984#HMDB08038#HMDB07940#HMDB07866	4 (72)	0.0427
SM(36:2)	SM	1.83715e-05	-0.536959									Glycosphingolipid metabolism	EHMN	3	HMDB04952#HMDB04951#HMDB04957;HMDB04974;HMDB12096	4 (55)	0.0427
PC(P-16:0/18:1)	PC	1.36007e-05	-0.514794									Sphingolipid pathway	Wikipathways	3	HMDB04952#HMDB04951#HMDB04957;HMDB04974;HMDB12096	4 (16)	0.0427
PE(22:4/0:0)	LPE	0.00181694	-0.510899
Gly-DL-Phe	AA	0.0235239	-0.510232
PC(40:8)	PC	1.37416e-05	-0.504365
LPI(18:2)	LPI	0.00163741	-0.498536
PC(O-22:1/20:4)	PC	4.73938e-05	-0.495181
SM(42:3)	SM	4.2932e-06	-0.487916
PUFA(20:3n-3)	PUFA	0.000173304	-0.48678
PC(P-18:0/0:0)	LPC	0.0476645	-0.467024
PC(O-24:1/20:4)	PC	0.000159227	-0.454017
PE(0:0/18:1)	LPE	6.70878e-05	-0.451052
SFA(18:0)	SFA	8.8831e-05	-0.450555
SM(d18:2/22:0)	SM	5.9102e-06	-0.44596
SM(d18:2/16:0)	SM	6.4341e-06	-0.442038
PC(22:6/0:0)	LPC	0.00034423	-0.429972
Cortisol (hydrocortisone)	ST	0.000801376	-0.421623
SM(42:1)	SM	2.46561e-07	-0.420161
PE(18:1e/22:6)	PE	0.00595069	-0.419881
PE(0:0/22:6)	LPE	0.00095523	-0.419847
ChoE(20:4)	ChoE	9.93835e-05	-0.413884
PC(18:0/20:4)	PC	0.000100218	-0.409976
PC(O-34:1)	PC	2.7342e-06	-0.409825
PE(22:5/0:0)	LPE	0.00205569	-0.409479
PE(18:2/0:0)	LPE	0.00313062	-0.408963
SM(d18:1/22:0)	SM	1.35825e-07	-0.408768
PC(P-36:2)	PC	4.89839e-05	-0.403858
PC(O-22:0/0:0)	LPC	0.00271595	-0.401563
PC(O-38:5)	PC	4.9791e-06	-0.389082
ChoE(18:1)	ChoE	1.56338e-05	-0.387142
PE(P-16:1/0:0)	LPE	0.0003427	-0.37434
SM(d18:1/24:1) + SM(d18:2/24:0)	SM	2.66425e-05	-0.373832
SM(d18:1/18:0)	SM	0.000700862	-0.370995
PE(P-20:2/0:0)	LPE	0.00689844	-0.370654
PC(0:0/20:1)	LPC	0.00155817	-0.370642
PC(18:2/0:0)	LPC	0.00149521	-0.361958
PE(P-16:0/22:6)	PE	0.0050216	-0.350357
PC(P-16:0/22:6)	PC	0.0079349	-0.337951
ChoE(16:0)	ChoE	0.000214724	-0.336036
LPI(20:4)	LPI	0.00210111	-0.334619
PC(P-16:0/0:0)	LPC	0.0358913	-0.328461
PC(O-16:0/18:2)	PC	0.0313541	-0.325719
TG(54:4)	TG	0.00306647	-0.32442
PC(16:1/0:0)	LPC	0.00101269	-0.321651
PE(0:0/20:4)	LPE	2.02872e-05	-0.321174
TG(54:5)	TG	0.0460403	-0.31686
PC(0:0/17:1)	LPC	0.00245479	-0.316009
ChoE(18:2)	ChoE	2.063e-06	-0.31378
SM(d18:1/16:0)	SM	6.59475e-08	-0.313459
PUFA(20:3n-x)	PUFA	0.0434992	-0.308122
PC(0:0/15:0)	LPC	0.0498845	-0.296153
SFA(16:0)	SFA	0.045614	-0.289106
SM(d18:1/23:0)	SM	0.00126781	-0.278768
PC(20:4/0:0)	LPC	0.0124699	-0.277354
SM(38:1)	SM	5.22553e-05	-0.268281
PC(16:0/0:0)	LPC	0.000111479	-0.260277
PC(0:0/16:0)	LPC	1.45369e-05	-0.252689
PE(0:0/16:0)	LPE	0.00205818	-0.251966
PE(22:5/0:0)	LPE	0.0207	-0.249646
PC(O-40:5)	PC	0.0178147	-0.243906
SM(d18:0/16:0)	SM	0.00206426	-0.242908
PC(18:2/20:4)	PC	0.0273587	-0.220143
PE(O-16:0/0:0)	LPE	0.0336651	-0.208175
NAE(16:0)	NAE	0.00442775	-0.196789
PE(16:0/0:0)	LPE	0.0256857	-0.19666
PC(16:0/20:4)	PC	0.0408439	-0.184513
PC(18:0/0:0)	LPC	0.00131325	-0.181428
PC(O-16:0/20:4)	PC	0.0287937	-0.179929
PE(20:4/0:0)	LPE	0.0198387	-0.160252
PE(18:1/0:0)	LPE	0.012258	-0.141111
PC(18:0/18:2)	PC	0.00572572	-0.0839709
TG(56:8)	TG	0.0472465	0.173523
PC(16:0/18:1)	PC	0.0388441	0.187924
PC(P-18:0/20:4)	PC	0.0244122	0.236277
PC(16:0/16:0)	PC	0.0186773	0.248143
PE(18:0/22:6)	PE	0.0407058	0.262129
PC(18:0/18:1)	PC	0.0148533	0.268243
PC(P-16:0/20:4)	PC	0.0186895	0.290275
PE(16:0/22:6)	PE	0.0271947	0.300525
PC(15:0/22:6)	PC	0.0102249	0.301587
SM(d18:1/23:1)	SM	0.048536	0.303184
PC(17:1/18:1)	PC	0.0178147	0.315024
PC(18:0/22:5)	PC	0.0045843	0.32249
PC(17:0/20:4)	PC	0.0124542	0.349656
PC(14:0/0:0)	LPC	0.012258	0.354702
PC(15:0/18:2)	PC	0.0460403	0.356224
Cer(d18:1/22:0)	Cer	0.0380137	0.35912
Cer(d18:1/20:0)	Cer	0.0460403	0.360986
TG(52:2)	TG	0.00977513	0.366393
SM(d18:1/12:0)	SM	0.000351227	0.401538
PC(P-17:0/20:4)	PC	0.00505849	0.426905
PE(16:0/20:4)	PE	0.0174136	0.428407
SFA(15:0)	SFA	0.0472465	0.452485
SM(31:1)	SM	0.000255458	0.455911
TG(56:3)	TG	0.0365219	0.466625
PE(38:5)	PE	0.012258	0.467475
PC(16:0/20:5)	PC	0.000573284	0.478648
PC(38:5)	PC	5.86568e-05	0.490312
PC(O-16:0/14:0)	PC	0.000860144	0.499071
ChoE(16:1)	ChoE	0.000718759	0.501633
ChoE(20:5)	ChoE	0.00101914	0.502234
DL-2-Aminoadipic acid	AA	0.0131549	0.514004
PC(16:0/19:1)	PC	5.43368e-07	0.534726
PC(20:5/0:0)	LPC	1.79115e-05	0.536967
TG(53:0)	TG	0.00514655	0.543973
Cer(d18:1/23:0)	Cer	2.57248e-05	0.544991
CMH(d18:1/22:0)	CMH	0.000548323	0.559545
Cer(d43:1)	Cer	0.000105768	0.560126
TG(53:3)	TG	0.00123006	0.575706
PC(P-16:0/14:0)	PC	0.000107379	0.593766
PE(16:0/18:1)	PE	0.00539581	0.604867
PC(22:4/0:0)	LPC	0.000642476	0.611752
PI(16:0/18:2)	PI	0.00675956	0.620826
TG(55:4)	TG	0.00109181	0.645867
Cer(d18:1/21:0)	Cer	2.47478e-05	0.652132
SM(43:2)	SM	6.51559e-05	0.663023
TG(54:2)	TG	0.00468563	0.665242
PC(37:5)	PC	1.75985e-07	0.668541
PE(O-16:0/18:1)	PE	1.76093e-05	0.704533
TG(51:4)	TG	0.00277768	0.71661
LPI(16:0)	LPI	0.00141965	0.718099
PC(0:0/20:5)	LPC	4.9791e-06	0.738382
ChoE(22:5)	ChoE	2.18546e-07	0.753319
PC(0:0/22:5)	LPC	3.69851e-09	0.754702
PC(22:5/0:0)	LPC	1.37617e-07	0.757824
DG(36:4)	DG	0.0194019	0.766322
PC(33:1)	PC	2.08866e-10	0.774293
PC(34:3)	PC	5.328e-06	0.783696
PC(0:0/18:3)	LPC	0.000100218	0.811715
Glutamic Acid	AA	0.00209589	0.844009
TG(50:3)	TG	8.3774e-06	0.861268
TG(51:3)	TG	1.5361e-06	0.890013
TG(50:4)	TG	0.000435337	0.918206
DG(34:1)	DG	0.00104109	0.927252
DG(34:2)	DG	0.00212968	0.931184
PC(32:1)	PC	7.60041e-11	0.961256
TG(55:3)	TG	4.9791e-06	0.969096
PC(18:2/0:0)	LPC	5.63142e-08	0.993762
TG(52:4)	TG	0.000262181	1.00546
PC(20:3/0:0)	LPC	2.70956e-08	1.01153
TG(53:2)	TG	1.0391e-06	1.0161
TG(60:3)	TG	0.00101914	1.02113
TG(56:7)	TG	1.19509e-08	1.03099
PE(20:5/16:0)	PE	1.378e-07	1.05117
TG(45:0)	TG	1.16194e-09	1.05904
DG(32:0)	DG	0.000268746	1.12856
TG(50:2)	TG	5.16367e-09	1.13884
TG(58:5)	TG	6.2884e-06	1.14364
PC(22:4/0:0)	LPC	1.96656e-08	1.16297
TG(50:5)	TG	0.000536147	1.16665
TG(51:2)	TG	2.00152e-08	1.17004
TG(49:3)	TG	2.17543e-11	1.22136
TG(50:1)	TG	1.85736e-08	1.22638
PC(14:0/14:0)	PC	1.502e-06	1.24163
TG(60:2)	TG	7.65572e-05	1.24741
TG(55:2)	TG	2.063e-06	1.27254
TG(52:1)	TG	2.8682e-06	1.30389
TG(56:2)	TG	0.000129302	1.30536
TG(58:3)	TG	0.00202027	1.32297
PC(16:0/17:0)	PC	1.18414e-16	1.34521
TG(58:1)	TG	2.31327e-07	1.40494
Glycochenodeoxycholic acid	BA	0.0129828	1.4076
PC(30:0)	PC	4.97989e-11	1.4139
TG(49:2)	TG	1.14682e-11	1.43369
Glycocholic acid	BA	0.000458422	1.43445
TG(45:1)	TG	9.71923e-13	1.48379
TG(54:0)	TG	3.67303e-07	1.48756
TG(47:2)	TG	9.97411e-13	1.49388
TG(58:2)	TG	5.56764e-05	1.49684
TG(47:1)	TG	1.49925e-12	1.55816
TG(48:3)	TG	6.48857e-08	1.56848
TG(49:0)	TG	2.19174e-11	1.60269
TG(48:2)	TG	2.80143e-10	1.65373
TG(49:1)	TG	3.77648e-11	1.69148
TG(56:1)	TG	2.46561e-07	1.7301
DG(32:1)	DG	9.84951e-10	1.73232
TG(51:1)	TG	6.87101e-11	1.73863
TG(53:1)	TG	6.02362e-09	1.74888
TG(50:0)	TG	2.00152e-08	1.76855
TG(48:0)	TG	4.58543e-10	1.81075
TG(47:0)	TG	5.76066e-18	1.87191
TG(48:1)	TG	4.31654e-12	1.92764
TG(54:1)	TG	2.6013e-06	1.95292
TG(52:0)	TG	1.28447e-07	1.9749
TG(46:0)	TG	1.0557e-13	2.22014
TG(46:2)	TG	1.35222e-10	2.30636
TG(46:1)	TG	1.79453e-11	2.36227
TG(44:0)	TG	1.79453e-11	2.46571
Taurochenodeoxycholic acid	BA	0.00607294	2.61874
TG(44:1)	TG	3.59313e-10	3.18561
TG(42:0)	TG	5.31188e-09	3.85795
TG(40:0)	TG	1.4437e-07	3.90132
Taurocholic acid	BA	9.1072e-06	4.19763

## Sheet: Supp. Tab. 2
Supp. Table 1 A					Supp. Table 1B							Supp. Table 1C
Metabolite name	Metabolic class	FDR (q val)	Log2 FC (MAFLD-HCC/OB-MAFLD)		Pathways downregulated in MAFLD-HCC compared to OB-MAFLD							Pathways upregulated in MAFLD-HCC compared to OB-MAFLD
DG(36:4)	DG	4.43586e-16	-2.67368		pathway_name	pathway_source	num_overlapping_metabolites	overlapping_metabolites	num_all_pathway_metabolites	P_metabolites		pathway_name	pathway_source	num_overlapping_metabolites	overlapping_metabolites	num_all_pathway_metabolites	P_metabolites
MUFA(14:1n-x)	MUFA	5.4964e-13	-2.33582		Biosynthesis of unsaturated fatty acids - Homo sapiens (human)	KEGG	12	HMDB02368;HMDB00220;HMDB02226;HMDB00827;HMDB03073;HMDB01388;HMDB06528;HMDB01043;HMDB00673;HMDB05060;HMDB00207;HMDB02183	13 (55)	0.000263		Digestion of dietary lipid	Reactome	8	HMDB00036;HMDB00637;HMDB00951;HMDB00619;HMDB05393;HMDB00518;HMDB00658#HMDB06729#HMDB10370#HMDB06731;HMDB00138	9 (17)	0.00164
9,10-DiHOME	oxFA	4.33964e-10	-2.19433		sphingosine and sphingosine-1-phosphate metabolism	HumanCyc	11	HMDB00220;HMDB00827;HMDB00638;HMDB03073;HMDB01388;HMDB00806;HMDB00277;HMDB01043;HMDB00673;HMDB00207;HMDB02183	12 (59)	0.000665		Digestion	Reactome	8	HMDB00036;HMDB00637;HMDB00951;HMDB00619;HMDB05393;HMDB00518;HMDB00658#HMDB06729#HMDB10370#HMDB06731;HMDB00138	9 (43)	0.00164
16:1n-9	MUFA	3.52289e-26	-2.16988		Signal Transduction	Reactome	20	HMDB10384#HMDB10404#HMDB10407#HMDB10395#HMDB12108#HMDB10382;HMDB09003#HMDB08927;HMDB10169#HMDB12103#HMDB12087#HMDB12105#HMDB10168#HMDB01348#HMDB12091;HMDB00220;HMDB02226;HMDB00638;HMDB00827;HMDB00207;HMDB01388;HMDB00806;HMDB00277;HMDB06528;HMDB00222;HMDB01043;HMDB03229;HMDB00673;HMDB07982#HMDB08048;HMDB06733#HMDB06726;HMDB03073;HMDB02183	29 (271)	0.00152		Digestion and absorption	Reactome	8	HMDB00036;HMDB00637;HMDB00951;HMDB00619;HMDB05393;HMDB00518;HMDB00658#HMDB06729#HMDB10370#HMDB06731;HMDB00138	9 (46)	0.00164
PUFA(14:2n-x)	PUFA	7.32376e-17	-2.1426		Signaling by GPCR	Reactome	18	HMDB10384#HMDB10404#HMDB10407#HMDB10395#HMDB12108#HMDB10382;HMDB09003#HMDB08927;HMDB00220;HMDB00207;HMDB02226;HMDB00638;HMDB00827;HMDB03073;HMDB01388;HMDB00806;HMDB00277;HMDB06528;HMDB01043;HMDB03229;HMDB00673;HMDB07982#HMDB08048;HMDB06733#HMDB06726;HMDB02183	25 (213)	0.00155		Digestion	Wikipathways	8	HMDB00036;HMDB00637;HMDB00951;HMDB00619;HMDB05393;HMDB00518;HMDB00658#HMDB06729#HMDB10370#HMDB06731;HMDB00138	9 (43)	0.00164
12-HETE	oxFA	2.08374e-05	-1.98636		GPCR downstream signalling	Reactome	18	HMDB10384#HMDB10404#HMDB10407#HMDB10395#HMDB12108#HMDB10382;HMDB09003#HMDB08927;HMDB00220;HMDB00207;HMDB02226;HMDB00638;HMDB00827;HMDB03073;HMDB01388;HMDB00806;HMDB00277;HMDB06528;HMDB01043;HMDB03229;HMDB00673;HMDB07982#HMDB08048;HMDB06733#HMDB06726;HMDB02183	25 (209)	0.00155		Immune System	Reactome	6	HMDB09060#HMDB09451;HMDB04952#HMDB04951#HMDB04957;HMDB07958#HMDB07866#HMDB07874#HMDB07970#HMDB07972#HMDB08138#HMDB00564#HMDB07984#HMDB08038#HMDB08206#HMDB07883#HMDB07940#HMDB07949#HMDB08056#HMDB08147#HMDB08270;HMDB05393;HMDB00904;HMDB00658#HMDB06729#HMDB10370#HMDB06731	6 (136)	0.00242
PUFA(16:3n-x)	PUFA	1.5154e-15	-1.90763		triacylglycerol degradation	HumanCyc	10	HMDB00220;HMDB00827;HMDB00638;HMDB03073;HMDB01388;HMDB00806;HMDB01043;HMDB00673;HMDB00207;HMDB02183	11 (54)	0.00162		Cholesterol metabolism - Homo sapiens (human)	KEGG	6	HMDB00036;HMDB00637;HMDB00951;HMDB05393;HMDB00658#HMDB06729#HMDB10370#HMDB06731;HMDB00138	6 (10)	0.00242
PUFA(16:3n-x)	PUFA	3.00475e-17	-1.83919		phospholipases	HumanCyc	10	HMDB00220;HMDB00827;HMDB00638;HMDB03073;HMDB01388;HMDB00806;HMDB01043;HMDB00673;HMDB00207;HMDB02183	11 (55)	0.00162		Transport of small molecules	Reactome	16	HMDB00036;HMDB10397#HMDB12108#HMDB10379;HMDB00951;HMDB00162;HMDB09060#HMDB09451;HMDB00619;HMDB12096;HMDB00148;HMDB00159;HMDB00929;HMDB00191;HMDB05393;HMDB00518;HMDB07958#HMDB07866#HMDB07874#HMDB07970#HMDB07972#HMDB08138#HMDB00564#HMDB07984#HMDB08038#HMDB08206#HMDB07883#HMDB07940#HMDB07949#HMDB08056#HMDB08147#HMDB08270;HMDB00658#HMDB06729#HMDB10370#HMDB06731;HMDB00138	26 (226)	0.0025
androsterone sulfate + etiocholanolone sulfate	ST	5.34049e-12	-1.77792		the visual cycle I (vertebrates)	HumanCyc	10	HMDB00220;HMDB00827;HMDB00638;HMDB03073;HMDB01388;HMDB00806;HMDB01043;HMDB00673;HMDB00207;HMDB02183	11 (58)	0.00162		Histidine_ lysine_ phenylalanine_ tyrosine_ proline and tryptophan catabolism	Reactome	7	HMDB00162;HMDB00510;HMDB00148;HMDB00159;HMDB00929;HMDB00191;HMDB00684	8 (91)	0.0046
18:2n-6	PUFA	6.70433e-29	-1.64075		sphingomyelin metabolism/ceramide salvage	HumanCyc	10	HMDB00220;HMDB00827;HMDB00638;HMDB03073;HMDB01388;HMDB00806;HMDB01043;HMDB00673;HMDB00207;HMDB02183	11 (55)	0.00162		Metabolism of proteins	Reactome	8	HMDB00162;HMDB00619;HMDB09060#HMDB09451;HMDB00148;HMDB00159;HMDB00929;HMDB00191;HMDB07958#HMDB07866#HMDB07874#HMDB07970#HMDB07972#HMDB08138#HMDB00564#HMDB07984#HMDB08038#HMDB08206#HMDB07883#HMDB07940#HMDB07949#HMDB08056#HMDB08147#HMDB08270	10 (269)	0.00599
isomer androsterone sulfate	ST	2.38066e-09	-1.53086		Fatty acid metabolism	Reactome	11	HMDB10384#HMDB10404#HMDB10407#HMDB10395#HMDB12108#HMDB10382;HMDB00220;HMDB12535;HMDB00222;HMDB07982#HMDB08048;HMDB01388;HMDB06528;HMDB01043;HMDB01976;HMDB00673;HMDB02183	13 (367)	0.00288		MTHFR deficiency	Wikipathways	5	HMDB04952#HMDB04951#HMDB04957;HMDB12096;HMDB00696;HMDB09060#HMDB09451;HMDB07958#HMDB07866#HMDB07874#HMDB07970#HMDB07972#HMDB08138#HMDB00564#HMDB07984#HMDB08038#HMDB08206#HMDB07883#HMDB07940#HMDB07949#HMDB08056#HMDB08147#HMDB08270	5 (20)	0.00714
16:2n-4,7	PUFA	9.11035e-22	-1.52284		Free fatty acid receptors	Reactome	11	HMDB03229;HMDB02226;HMDB00638;HMDB00827;HMDB03073;HMDB01388;HMDB00806;HMDB06528;HMDB00220;HMDB00207;HMDB02183	13 (24)	0.00288		Metabolism	Reactome	22	HMDB10397#HMDB12108#HMDB10379;HMDB00159;HMDB07958#HMDB07866#HMDB07874#HMDB07970#HMDB07972#HMDB08138#HMDB00564#HMDB07984#HMDB08038#HMDB08206#HMDB07883#HMDB07940#HMDB07949#HMDB08056#HMDB08147#HMDB08270;HMDB05393;HMDB00036;HMDB00619;HMDB00510;HMDB00191;HMDB00684;HMDB12096;HMDB00637;HMDB00951;HMDB00162;HMDB09060#HMDB09451;HMDB04974;HMDB00148;HMDB00929;HMDB00138;HMDB04952#HMDB04951#HMDB04957;HMDB00518…	45 (1384)	0.00948
PUFA(22:3n-x)	PUFA	2.74543e-08	-1.50463		Incretin synthesis_ secretion_ and inactivation	Wikipathways	11	HMDB10384#HMDB10404#HMDB10407#HMDB10395#HMDB12108#HMDB10382;HMDB00220;HMDB02226;HMDB00638;HMDB03073;HMDB01388;HMDB00806;HMDB06528;HMDB03229;HMDB00207;HMDB02183	13 (22)	0.00288		Biochemical Pathways Part I	Wikipathways	13	HMDB00036;HMDB00162;HMDB00696;HMDB00619;HMDB00510;HMDB00518;HMDB00148;HMDB00159;HMDB00929;HMDB00191;HMDB00684;HMDB00904;HMDB00138	21 (467)	0.00985
22:4n-6	PUFA	2.09177e-23	-1.44848		retinol biosynthesis	HumanCyc	9	HMDB00220;HMDB00827;HMDB03073;HMDB01388;HMDB00806;HMDB01043;HMDB00673;HMDB00207;HMDB02183	10 (37)	0.00378		Glucose Homeostasis	Wikipathways	6	HMDB00637;HMDB00951;HMDB00696;HMDB00159;HMDB00904;HMDB00138	7 (21)	0.0122
18:3n-6	PUFA	4.18242e-20	-1.42082		fatty acid activation	HumanCyc	9	HMDB00220;HMDB00827;HMDB03073;HMDB01388;HMDB00806;HMDB01043;HMDB00673;HMDB00207;HMDB02183	10 (38)	0.00378		Primary bile acid biosynthesis - Homo sapiens (human)	KEGG	6	HMDB00036;HMDB00637;HMDB00951;HMDB00619;HMDB00518;HMDB00138	7 (47)	0.0122
AC(14:2n-x)	AC	1.86292e-12	-1.37811		G alpha (q) signalling events	Reactome	12	HMDB00220;HMDB02226;HMDB00638;HMDB00827;HMDB03073;HMDB01388;HMDB00806;HMDB06528;HMDB01043;HMDB03229;HMDB00207;HMDB02183	15 (63)	0.00416		Bile acid biosynthesis	EHMN	7	HMDB00036;HMDB00951;HMDB00896;HMDB00619;HMDB00518;HMDB00658#HMDB06729#HMDB10370#HMDB06731;HMDB00138	9 (55)	0.0149
isomer androsterone sulfate	ST	6.57755e-10	-1.36943		G alpha (q) signalling events	Wikipathways	10	HMDB00220;HMDB02226;HMDB00638;HMDB03073;HMDB01388;HMDB00806;HMDB06528;HMDB03229;HMDB00207;HMDB02183	12 (52)	0.00637		Amino Acid metabolism	Wikipathways	7	HMDB00162;HMDB00696;HMDB00148;HMDB00159;HMDB00929;HMDB00191;HMDB00904	9 (108)	0.0149
x-HODE	oxFA	2.54641e-21	-1.32542		G alpha (i) signalling events	Reactome	10	HMDB10384#HMDB10404#HMDB10407#HMDB10395#HMDB12108#HMDB10382;HMDB09003#HMDB08927;HMDB00220;HMDB00827;HMDB07982#HMDB08048;HMDB00207;HMDB00277;HMDB01043;HMDB00673;HMDB06733#HMDB06726	12 (159)	0.00637		Vesicle-mediated transport	Reactome	4	HMDB10397#HMDB12108#HMDB10379;HMDB00658#HMDB06729#HMDB10370#HMDB06731;HMDB05393;HMDB07958#HMDB07866#HMDB07874#HMDB07970#HMDB07972#HMDB08138#HMDB00564#HMDB07984#HMDB08038#HMDB08206#HMDB07883#HMDB07940#HMDB07949#HMDB08056#HMDB08147#HMDB08270	4 (66)	0.0204
isomer pregn-5-ene-3,20-diol sulfate	ST	1.36338e-05	-1.30365		Linoleic acid metabolism - Homo sapiens (human)	KEGG	6	HMDB07982#HMDB08048;HMDB03073;HMDB01043;HMDB04705;HMDB04704;HMDB00673	6 (28)	0.00856		Membrane Trafficking	Reactome	4	HMDB10397#HMDB12108#HMDB10379;HMDB00658#HMDB06729#HMDB10370#HMDB06731;HMDB05393;HMDB07958#HMDB07866#HMDB07874#HMDB07970#HMDB07972#HMDB08138#HMDB00564#HMDB07984#HMDB08038#HMDB08206#HMDB07883#HMDB07940#HMDB07949#HMDB08056#HMDB08147#HMDB08270	4 (30)	0.0204
Dehydroepiandrosterone sulfate (DHEAS)	ST	5.0619e-06	-1.28656		Fatty acid biosynthesis - Homo sapiens (human)	KEGG	6	HMDB00220;HMDB00827;HMDB00638;HMDB00806;HMDB03229;HMDB00207	6 (50)	0.00856		Arginine: Glycine Amidinotransferase Deficiency (AGAT Deficiency)	SMPDB	4	HMDB00904;HMDB00162;HMDB00191;HMDB00148	4 (52)	0.0204
22:5n-6	PUFA	5.36839e-17	-1.22305		Transport of fatty acids	Reactome	6	HMDB00220;HMDB00827;HMDB00638;HMDB00806;HMDB00673;HMDB00207	6 (10)	0.00856		Innate Immune System	Reactome	4	HMDB00904;HMDB00658#HMDB06729#HMDB10370#HMDB06731;HMDB05393;HMDB07958#HMDB07866#HMDB07874#HMDB07970#HMDB07972#HMDB08138#HMDB00564#HMDB07984#HMDB08038#HMDB08206#HMDB07883#HMDB07940#HMDB07949#HMDB08056#HMDB08147#HMDB08270	4 (99)	0.0204
12(S)-HHTrE	oxFA	0.00207134	-1.18104		Neurotransmitter release cycle	Wikipathways	6	HMDB00220;HMDB00638;HMDB00806;HMDB02100;HMDB01043;HMDB00207	6 (37)	0.00856		Arginine Proline metabolism	INOH	4	HMDB00904;HMDB00191;HMDB00162;HMDB00148	4 (68)	0.0204
AC(18:2n-6)	AC	1.96548e-17	-1.17946		Alpha Linolenic Acid and Linoleic Acid Metabolism	SMPDB	9	HMDB02226;HMDB07982#HMDB08048;HMDB03073;HMDB01388;HMDB06528;HMDB01043;HMDB01976;HMDB00673;HMDB02183	11 (18)	0.0135		Plasma lipoprotein assembly_ remodeling_ and clearance	Reactome	4	HMDB10397#HMDB12108#HMDB10379;HMDB00658#HMDB06729#HMDB10370#HMDB06731;HMDB05393;HMDB07958#HMDB07866#HMDB07874#HMDB07970#HMDB07972#HMDB08138#HMDB00564#HMDB07984#HMDB08038#HMDB08206#HMDB07883#HMDB07940#HMDB07949#HMDB08056#HMDB08147#HMDB08270	4 (25)	0.0204
PC(P-20:2/0:0)	LPC	2.41e-06	-1.16587		Neuronal System	Reactome	7	HMDB00220;HMDB00827;HMDB00638;HMDB00806;HMDB02100;HMDB01043;HMDB00207	8 (65)	0.0184		Glycerophospholipid biosynthesis	Reactome	4	HMDB10397#HMDB12108#HMDB10379;HMDB09060#HMDB09451;HMDB05393;HMDB07958#HMDB07866#HMDB07874#HMDB07970#HMDB07972#HMDB08138#HMDB00564#HMDB07984#HMDB08038#HMDB08206#HMDB07883#HMDB07940#HMDB07949#HMDB08056#HMDB08147#HMDB08270	4 (93)	0.0204
isomer Dehydroepiandrosterone sulfate (DHEAS)	ST	1.48174e-05	-1.16574		Neurotransmitter release cycle	Reactome	7	HMDB00220;HMDB00827;HMDB00638;HMDB00806;HMDB02100;HMDB01043;HMDB00207	8 (45)	0.0184		Phospholipid metabolism	Reactome	4	HMDB10397#HMDB12108#HMDB10379;HMDB09060#HMDB09451;HMDB05393;HMDB07958#HMDB07866#HMDB07874#HMDB07970#HMDB07972#HMDB08138#HMDB00564#HMDB07984#HMDB08038#HMDB08206#HMDB07883#HMDB07940#HMDB07949#HMDB08056#HMDB08147#HMDB08270	4 (103)	0.0204
12,13-DiHOME	oxFA	1.5252e-06	-1.16404		Transmission across Chemical Synapses	Reactome	7	HMDB00220;HMDB00827;HMDB00638;HMDB00806;HMDB02100;HMDB01043;HMDB00207	8 (65)	0.0184		HDL remodeling	Reactome	4	HMDB10397#HMDB12108#HMDB10379;HMDB00658#HMDB06729#HMDB10370#HMDB06731;HMDB05393;HMDB07958#HMDB07866#HMDB07874#HMDB07970#HMDB07972#HMDB08138#HMDB00564#HMDB07984#HMDB08038#HMDB08206#HMDB07883#HMDB07940#HMDB07949#HMDB08056#HMDB08147#HMDB08270	4 (17)	0.0204
PC(O-20:2/0:0)	LPC	2.86555e-07	-1.1463		The canonical retinoid cycle in rods (twilight vision)	Reactome	5	HMDB00220;HMDB00673;HMDB00207;HMDB00827;HMDB09003#HMDB08927	5 (33)	0.02		Plasma lipoprotein remodeling	Reactome	4	HMDB10397#HMDB12108#HMDB10379;HMDB00658#HMDB06729#HMDB10370#HMDB06731;HMDB05393;HMDB07958#HMDB07866#HMDB07874#HMDB07970#HMDB07972#HMDB08138#HMDB00564#HMDB07984#HMDB08038#HMDB08206#HMDB07883#HMDB07940#HMDB07949#HMDB08056#HMDB08147#HMDB08270	4 (20)	0.0204
LPC(O-22:2)	LPC	1.6895e-06	-1.06813		De novo fatty acid biosynthesis	EHMN	5	HMDB00220;HMDB00806;HMDB00207;HMDB00827;HMDB00638	5 (59)	0.02		Hyperornithinemia with gyrate atrophy (HOGA)	SMPDB	4	HMDB00904;HMDB00162;HMDB00191;HMDB00148	4 (52)	0.0204
18:1n-9	MUFA	3.33022e-21	-1.04843		Class A/1 (Rhodopsin-like receptors)	Reactome	12	HMDB00220;HMDB00827;HMDB00638;HMDB02226;HMDB03073;HMDB01388;HMDB00806;HMDB00277;HMDB06528;HMDB03229;HMDB00207;HMDB02183	17 (82)	0.0248		Creatine deficiency_ guanidinoacetate methyltransferase deficiency	SMPDB	4	HMDB00904;HMDB00162;HMDB00191;HMDB00148	4 (52)	0.0204
MUFA(17:1n-x)	MUFA	8.43014e-12	-0.982158		Visual phototransduction	Reactome	6	HMDB09003#HMDB08927;HMDB06733#HMDB06726;HMDB00827;HMDB00220;HMDB00673;HMDB00207	7 (65)	0.0384		L-arginine:glycine amidinotransferase deficiency	SMPDB	4	HMDB00904;HMDB00162;HMDB00191;HMDB00148	4 (52)	0.0204
16:1n-7	MUFA	7.13239e-09	-0.97066		Sphingolipid de novo biosynthesis	Reactome	6	HMDB09003#HMDB08927;HMDB00220;HMDB00827;HMDB07982#HMDB08048;HMDB00277;HMDB10169#HMDB12103#HMDB12087#HMDB12105#HMDB10168#HMDB01348#HMDB12091	7 (35)	0.0384		Hyperornithinemia-hyperammonemia-homocitrullinuria [HHH-syndrome]	SMPDB	4	HMDB00904;HMDB00162;HMDB00191;HMDB00148	4 (52)	0.0204
20:2n-6	PUFA	3.58125e-11	-0.969308		Oxylipin metabolism	Wikipathways	6	HMDB05060;HMDB01388;HMDB01043;HMDB04705;HMDB00673;HMDB02183	7 (64)	0.0384		Guanidinoacetate Methyltransferase Deficiency (GAMT Deficiency)	SMPDB	4	HMDB00904;HMDB00162;HMDB00191;HMDB00148	4 (52)	0.0204
Pregnenolone sulfate	ST	0.0163363	-0.935266		Class A-1 (Rhodopsin-like receptors)	Wikipathways	11	HMDB00220;HMDB02226;HMDB00638;HMDB03073;HMDB01388;HMDB00806;HMDB00277;HMDB06528;HMDB03229;HMDB00207;HMDB02183	16 (104)	0.0454		Prolinemia Type II	SMPDB	4	HMDB00904;HMDB00162;HMDB00191;HMDB00148	4 (52)	0.0204
20:4n-6	PUFA	9.86014e-15	-0.927158		fatty acid &beta;-oxidation	HumanCyc	4	HMDB00220;HMDB00806;HMDB00827;HMDB00638	4 (84)	0.0455		Prolidase Deficiency (PD)	SMPDB	4	HMDB00904;HMDB00162;HMDB00191;HMDB00148	4 (52)	0.0204
SM(d18:0/18:0)	SM	2.0782e-06	-0.87801		alpha-linolenic (omega3) and linoleic (omega6) acid metabolism	Reactome	4	HMDB01976;HMDB00673;HMDB01388;HMDB02183	4 (42)	0.0455		Arginine and Proline Metabolism	SMPDB	4	HMDB00904;HMDB00162;HMDB00191;HMDB00148	4 (52)	0.0204
20:3n-3	PUFA	1.99797e-15	-0.870524		acyl-CoA hydrolysis	HumanCyc	4	HMDB00220;HMDB00806;HMDB00827;HMDB00638	4 (39)	0.0455		Hyperprolinemia Type I	SMPDB	4	HMDB00904;HMDB00162;HMDB00191;HMDB00148	4 (52)	0.0204
20:1n-6	MUFA	1.83099e-11	-0.86232		Linoleate metabolism	EHMN	4	HMDB03073;HMDB10384#HMDB10404#HMDB10407#HMDB10395#HMDB12108#HMDB10382;HMDB00673;HMDB07982#HMDB08048	4 (24)	0.0455		Hyperprolinemia Type II	SMPDB	4	HMDB00904;HMDB00162;HMDB00191;HMDB00148	4 (52)	0.0204
22:6n-3	PUFA	1.57123e-10	-0.86078		alpha-linolenic (omega3) and linoleic (omega6) acid metabolism	Wikipathways	4	HMDB01388;HMDB00673;HMDB02183;HMDB01976	4 (42)	0.0455		Ornithine Aminotransferase Deficiency (OAT Deficiency)	SMPDB	4	HMDB00904;HMDB00162;HMDB00191;HMDB00148	4 (52)	0.0204
PE(22:5/0:0)	LPE	2.16772e-09	-0.854986		Arachidonic acid metabolism	Wikipathways	4	HMDB10384#HMDB10404#HMDB10407#HMDB10395#HMDB12108#HMDB10382;HMDB12535;HMDB01043;HMDB07982#HMDB08048	4 (107)	0.0455		Glycerophospholipid biosynthesis	Wikipathways	4	HMDB10397#HMDB12108#HMDB10379;HMDB05393;HMDB09060#HMDB09451;HMDB07958#HMDB07866#HMDB07874#HMDB07970#HMDB07972#HMDB08138#HMDB00564#HMDB07984#HMDB08038#HMDB08206#HMDB07883#HMDB07940#HMDB07949#HMDB08056#HMDB08147#HMDB08270	4 (94)	0.0204
x-OxoODE	oxFA	1.88963e-13	-0.822515		Visual phototransduction	Wikipathways	4	HMDB00220;HMDB00673;HMDB00207;HMDB09003#HMDB08927	4 (57)	0.0455		Plasma lipoprotein assembly_ remodeling_ and clearance	Wikipathways	4	HMDB10397#HMDB12108#HMDB10379;HMDB00658#HMDB06729#HMDB10370#HMDB06731;HMDB05393;HMDB07958#HMDB07866#HMDB07874#HMDB07970#HMDB07972#HMDB08138#HMDB00564#HMDB07984#HMDB08038#HMDB08206#HMDB07883#HMDB07940#HMDB07949#HMDB08056#HMDB08147#HMDB08270	4 (21)	0.0204
PUFA(20:2n-x)	PUFA	2.1796e-07	-0.786261		fatty acid &beta;-oxidation (peroxisome)	HumanCyc	4	HMDB00220;HMDB00806;HMDB00827;HMDB00638	4 (85)	0.0455		Glycerophospholipid metabolism	EHMN	5	HMDB10397#HMDB12108#HMDB10379;HMDB00658#HMDB06729#HMDB10370#HMDB06731;HMDB09060#HMDB09451;HMDB05393;HMDB07958#HMDB07866#HMDB07874#HMDB07970#HMDB07972#HMDB08138#HMDB00564#HMDB07984#HMDB08038#HMDB08206#HMDB07883#HMDB07940#HMDB07949#HMDB08056#HMDB08147#HMDB08270	6 (96)	0.0307
18:3n-3	PUFA	1.61415e-11	-0.783083		GPCR ligand binding	Reactome	12	HMDB00220;HMDB02226;HMDB00638;HMDB00827;HMDB03073;HMDB01388;HMDB00806;HMDB00277;HMDB06528;HMDB03229;HMDB00207;HMDB02183	18 (141)	0.0487		Transport of organic anions	Reactome	5	HMDB00036;HMDB00951;HMDB00138;HMDB00619;HMDB00518	6 (19)	0.0307
AC(16:0)	AC	5.68774e-09	-0.781303									Bile Acid Biosynthesis	SMPDB	8	HMDB00036;HMDB00637;HMDB00951;HMDB00896;HMDB00619;HMDB00518;HMDB00658#HMDB06729#HMDB10370#HMDB06731;HMDB00138	12 (62)	0.0345
PUFA(18:2n-x)	PUFA	1.2611e-06	-0.774808									27-Hydroxylase Deficiency	SMPDB	8	HMDB00036;HMDB00637;HMDB00951;HMDB00896;HMDB00619;HMDB00518;HMDB00658#HMDB06729#HMDB10370#HMDB06731;HMDB00138	12 (62)	0.0345
PC(0:0/20:4)	LPC	1.6076e-12	-0.768964									Congenital Bile Acid Synthesis Defect Type II	SMPDB	8	HMDB00036;HMDB00637;HMDB00951;HMDB00896;HMDB00619;HMDB00518;HMDB00658#HMDB06729#HMDB10370#HMDB06731;HMDB00138	12 (62)	0.0345
PC(O-24:2/0:0)	LPC	4.56456e-05	-0.767638									Cerebrotendinous Xanthomatosis (CTX)	SMPDB	8	HMDB00036;HMDB00637;HMDB00951;HMDB00896;HMDB00619;HMDB00518;HMDB00658#HMDB06729#HMDB10370#HMDB06731;HMDB00138	12 (62)	0.0345
PE(22:6/0:0)	LPE	5.70171e-09	-0.725842									Zellweger Syndrome	SMPDB	8	HMDB00036;HMDB00637;HMDB00951;HMDB00896;HMDB00619;HMDB00518;HMDB00658#HMDB06729#HMDB10370#HMDB06731;HMDB00138	12 (62)	0.0345
SFA(16:0)	SFA	3.04354e-15	-0.710265									Familial Hypercholanemia (FHCA)	SMPDB	8	HMDB00036;HMDB00637;HMDB00951;HMDB00896;HMDB00619;HMDB00518;HMDB00658#HMDB06729#HMDB10370#HMDB06731;HMDB00138	12 (62)	0.0345
SFA(18:0)	SFA	1.40983e-12	-0.709055									Congenital Bile Acid Synthesis Defect Type III	SMPDB	8	HMDB00036;HMDB00637;HMDB00951;HMDB00896;HMDB00619;HMDB00518;HMDB00658#HMDB06729#HMDB10370#HMDB06731;HMDB00138	12 (62)	0.0345
MUFA(19:1n-x)	MUFA	1.03363e-08	-0.690003									Aminoacyl-tRNA biosynthesis - Homo sapiens (human)	KEGG	6	HMDB00162;HMDB00696;HMDB00148;HMDB00159;HMDB00929;HMDB00191	8 (52)	0.035
NAE(18:1n-9)	NAE	1.98645e-09	-0.644038									Synthesis of bile acids and bile salts via 7alpha-hydroxycholesterol	Reactome	6	HMDB00036;HMDB00637;HMDB00951;HMDB00619;HMDB00518;HMDB00138	8 (51)	0.035
Sphingosine-1-phosphate	FSB	4.21006e-08	-0.620271									Synthesis of bile acids and bile salts	Reactome	6	HMDB00036;HMDB00637;HMDB00951;HMDB00619;HMDB00518;HMDB00138	8 (75)	0.035
PE(0:0/20:3)	LPE	6.1781e-06	-0.611462									Bile acid and bile salt metabolism	Reactome	6	HMDB00036;HMDB00637;HMDB00951;HMDB00619;HMDB00518;HMDB00138	8 (80)	0.035
22:5n-3	PUFA	6.22796e-07	-0.609677									Central carbon metabolism in cancer - Homo sapiens (human)	KEGG	6	HMDB00162;HMDB00696;HMDB00148;HMDB00159;HMDB00929;HMDB00191	8 (37)	0.035
SFA(17:0)	SFA	1.67231e-05	-0.606759									S-methyl-5-thio-&alpha;-D-ribose 1-phosphate degradation	HumanCyc	6	HMDB00162;HMDB00696;HMDB00148;HMDB00159;HMDB00929;HMDB00191	8 (35)	0.035
AC(10:0)	AC	1.29826e-05	-0.595225									Recycling of bile acids and salts	Reactome	6	HMDB00036;HMDB00637;HMDB00951;HMDB00619;HMDB00518;HMDB00138	8 (24)	0.035
PC(20:4/0:0)	LPC	2.33632e-11	-0.58847									Protein digestion and absorption - Homo sapiens (human)	KEGG	6	HMDB00162;HMDB00696;HMDB00148;HMDB00159;HMDB00929;HMDB00191	8 (47)	0.035
PC(O-18:1/0:0)	LPC	2.8549e-05	-0.584721									Bile acid and bile salt metabolism	Wikipathways	6	HMDB00036;HMDB00637;HMDB00951;HMDB00619;HMDB00518;HMDB00138	8 (76)	0.035
PC(O-20:1/0:0)	LPC	0.00162235	-0.583736									tRNA charging	HumanCyc	6	HMDB00162;HMDB00696;HMDB00148;HMDB00159;HMDB00929;HMDB00191	8 (24)	0.035
PUFA(22:3n-x)	PUFA	0.0044983	-0.579098									&gamma;-glutamyl cycle	HumanCyc	6	HMDB00162;HMDB00696;HMDB00148;HMDB00159;HMDB00929;HMDB00191	8 (29)	0.035
TG(54:6)	TG	7.8446e-08	-0.578687									Bile secretion - Homo sapiens (human)	KEGG	7	HMDB00036;HMDB00637;HMDB00951;HMDB00619;HMDB00518;HMDB00658#HMDB06729#HMDB10370#HMDB06731;HMDB00138	10 (162)	0.0358
PE(22:5/0:0)	LPE	1.6895e-06	-0.564366
PC(0:0/18:2)	LPC	1.54847e-09	-0.564114
AC(18:1n-9)	AC	0.00707033	-0.562434
TG(54:5)	TG	3.80315e-08	-0.56164
LPI(20:3)	LPI	3.4042e-06	-0.560756
PE(P-18:2/0:0)	LPE	0.00580906	-0.559696
isomer androsterone sulfate	ST	0.000186076	-0.548409
14:1n-5	MUFA	0.004225	-0.527272
NAE(18:0)	NAE	1.0715e-06	-0.518893
PUFA(20:4n-x)	PUFA	0.000693087	-0.514396
SM(d18:0/22:0)	SM	1.27323e-05	-0.512049
PC(0:0/18:0)	LPC	2.74543e-08	-0.509338
x-HODE	oxFA	5.60128e-08	-0.493246
PI(18:0/20:3)	PI	1.6508e-06	-0.481183
PC(O-22:1/0:0)	LPC	0.00511154	-0.477992
PC(0:0/18:1)	LPC	2.27407e-07	-0.477606
TG(56:8)	TG	0.0131309	-0.477226
SM(36:2)	SM	2.32649e-09	-0.473134
PC(O-24:1/0:0)	LPC	0.000129721	-0.457899
Cortisol (hydrocortisone)	ST	0.0295258	-0.455909
PC(P-20:1/0:0)	LPC	0.0174188	-0.442082
TG(52:4)	TG	5.79075e-08	-0.440237
PC(P-18:1/0:0)	LPC	2.81289e-05	-0.426198
TG(54:7)	TG	1.21877e-08	-0.399588
TG(54:4)	TG	2.79293e-08	-0.387636
SM(d18:2/16:0)	SM	7.42065e-12	-0.384649
PE(20:4/0:0)	LPE	1.83755e-08	-0.382731
PC(18:0/20:4)	PC	2.71914e-11	-0.378023
PC(0:0/17:1)	LPC	0.000721425	-0.368323
PE(0:0/20:4)	LPE	3.70807e-07	-0.36533
NAE(16:0)	NAE	6.39815e-07	-0.361481
PE(22:4/0:0)	LPE	5.07176e-05	-0.360326
SM(d18:2/22:0)	SM	5.01298e-09	-0.351615
PC(0:0/22:5)	LPC	0.00068597	-0.350315
LPI(18:2)	LPI	0.000238374	-0.347091
PC(0:0/22:4)	LPC	2.81289e-05	-0.345317
PE(0:0/22:6)	LPE	0.000257892	-0.345206
SM(d18:1/18:0)	SM	1.50443e-07	-0.336356
SM(42:1)	SM	8.42979e-10	-0.334323
PC(22:6/0:0)	LPC	3.99363e-07	-0.322372
ChoE(20:4)	ChoE	1.15254e-11	-0.306824
PC(P-16:0/0:0)	LPC	0.00297009	-0.305728
PI(18:0/20:4)	PI	4.39466e-05	-0.301591
20:4n-3	PUFA	0.00639836	-0.301108
SM(42:3)	SM	1.5252e-06	-0.288389
SM(38:0)	SM	0.00155444	-0.287607
SFA(14:0)	SFA	0.00265117	-0.274034
24:1n-9	MUFA	0.00282674	-0.271111
PC(O-18:1/22:4)	PC	4.18694e-07	-0.266888
TG(58:10)	TG	0.00173913	-0.263173
PC(18:2/0:0)	LPC	3.05435e-05	-0.261645
TG(56:7)	TG	9.33325e-05	-0.255648
PC(O-16:0/0:0)	LPC	0.00900875	-0.247904
SM(d18:2/14:0)	SM	0.000226227	-0.242354
PE(16:0/0:0)	LPE	0.000658124	-0.237711
PE(0:0/18:2)	LPE	2.7604e-06	-0.227733
D(-)-2-Aminobutyric acid	AA	0.00508554	-0.226524
PE(0:0/16:0)	LPE	0.000687183	-0.224222
PC(0:0/22:6)	LPC	0.000590044	-0.21961
PC(O-38:4)	PC	1.13539e-05	-0.218022
SM(d18:2/23:0)	SM	7.81499e-05	-0.211174
ChoE(22:6)	ChoE	0.000405328	-0.208022
SM(d18:1/22:0)	SM	1.95334e-08	-0.198114
PE(18:0/0:0)	LPE	6.55926e-05	-0.191796
20:3n-9	PUFA	0.0254411	-0.175297
PC(16:0/0:0)	LPC	6.8658e-06	-0.171474
PC(17:0/0:0)	LPC	0.0295258	-0.170998
LPI(20:4)	LPI	0.00146832	-0.168364
TG(52:3)	TG	2.7834e-05	-0.15041
PC(20:1/0:0)	LPC	0.0211755	-0.146357
PC(0:0/16:0)	LPC	2.98971e-05	-0.144114
TG(56:5)	TG	0.000695519	-0.14411
SM(d18:1/23:0)	SM	0.000165949	-0.130879
DG(38:5)	DG	0.000591405	-0.117765
SFA(12:0)	SFA	0.00143832	-0.117025
PUFA(20:3n-x)	PUFA	0.00433052	-0.115558
PC(O-24:1/20:4)	PC	0.00662335	-0.115386
PC(16:0/20:4)	PC	3.15487e-05	-0.113276
SM(d18:0/16:0)	SM	0.00224595	-0.108509
PC(22:5/0:0)	LPC	0.0370171	-0.106084
TG(58:9)	TG	0.00222478	-0.100415
PC(40:5)	PC	0.00348022	-0.0993913
PC(O-22:1/20:4)	PC	0.00557727	-0.0989134
PE(18:0/20:4)	PE	0.00866361	-0.0956937
PC(O-18:0/22:4)	PC	0.00561478	-0.09432
PC(18:1/0:0)	LPC	0.00693971	-0.0875173
PC(18:0/0:0)	LPC	0.000963077	-0.0834867
SM(d18:1/24:1) + SM(d18:2/24:0)	SM	0.000501087	-0.0696355
SM(d18:1/16:0)	SM	3.77399e-05	-0.0560682
PE(18:2/0:0)	LPE	0.000721425	-0.0513283
PE(0:0/18:1)	LPE	0.00095282	-0.0400418
PE(16:0/18:1)	PE	0.00288511	-0.038658
PC(O-16:0/22:4)	PC	0.00626912	-0.0369596
SM(38:1)	SM	0.00342915	0.0298706
PC(O-34:1)	PC	0.0235727	0.0328295
TG(54:5)	TG	0.0499092	0.03605
TG(54:3)	TG	0.0193394	0.054997
ChoE(18:1)	ChoE	1.29513e-05	0.0910724
PE(18:1/0:0)	LPE	0.0326414	0.13245
ChoE(18:2)	ChoE	2.48647e-07	0.230728
ChoE(22:4)	ChoE	4.5593e-07	0.275203
ChoE(16:1)	ChoE	0.00313347	0.324436
PE(18:2/0:0)	LPE	0.0301814	0.374126
PC(0:0/17:0)	LPC	0.0188035	0.382098
PC(20:0/18:2)	PC	0.0282813	0.388478
PC(20:2/0:0)	LPC	0.0120388	0.389113
PC(15:0/20:4)	PC	0.00858159	0.400097
PC(16:0/18:1)	PC	0.000383751	0.407373
Methionine	AA	0.0400724	0.418643
PC(14:0/20:4)	PC	0.0301698	0.425966
PC(40:8)	PC	0.0113651	0.432695
PC(38:5)	PC	0.00015543	0.438702
PC(0:0/20:2)	LPC	0.00666653	0.443975
PC(16:0/16:0)	PC	8.33336e-05	0.459405
PE(P-16:0/20:4)	PE	0.0324696	0.468046
Proline	AA	0.0292846	0.468259
PC(16:0/18:0)	PC	0.000693087	0.472028
SM(d18:1/12:0)	SM	0.00273451	0.475466
Cer(d18:1/24:1)+Cer(d18:2/24:0)	Cer	0.00348022	0.482638
PC(O-18:1/18:1)	PC	0.0111179	0.505359
Tryptophan	AA	0.00503194	0.524383
TG(50:2)	TG	0.00818994	0.526465
PE(38:5)	PE	0.0107132	0.527251
PC(18:2/20:4)	PC	0.00497338	0.528966
PC(P-16:0/20:4)	PC	0.000166255	0.531665
Cer(40:2)	Cer	0.00898204	0.548062
PE(16:1e/20:3)	PE	0.0314622	0.549213
ChoE(18:3)	ChoE	1.46425e-11	0.567184
PE(P-18:1/20:4)	PE	0.00195007	0.569318
Cer(d18:1/22:0)	Cer	0.000385615	0.586092
PC(17:0/18:2)	PC	2.06251e-05	0.592186
LPI(18:1)	LPI	0.00102818	0.594106
DL-2-Aminoadipic acid	AA	0.0175171	0.601093
Glutamic Acid	AA	0.00786787	0.603928
TG(50:1)	TG	0.00625927	0.608102
Phenylalanine	AA	0.000189527	0.610982
L-Citrulline	AA	0.00144326	0.614082
PC(O-16:0/18:2)	PC	0.00580906	0.618588
PC(0:0/14:0)	LPC	2.93509e-05	0.619455
TG(55:4)	TG	0.00652592	0.620394
PC(18:3/18:3)	PC	6.46029e-05	0.628345
Kynurenine	AA	0.000709779	0.629088
PC(18:0/18:1)	PC	3.61972e-08	0.650024
TG(51:3)	TG	0.000899373	0.656306
PC(14:0/18:2)	PC	0.000142733	0.663741
PC(17:0/20:4)	PC	3.409e-05	0.670459
PE(P-18:1/0:0)	LPE	0.0035103	0.680069
PE(P-18:0/20:4)	PE	0.000582275	0.682864
PC(18:0/22:5)	PC	2.15267e-08	0.684735
Cer(d18:1/20:0)	Cer	2.41e-06	0.696449
Cer(d18:1/23:0)	Cer	1.0206e-06	0.704946
PC(17:1/18:2)	PC	0.000582275	0.717591
PC(14:0/0:0)	LPC	2.89138e-07	0.721518
SM(43:2)	SM	2.80551e-05	0.739424
PE(18:2e/22:6)	PE	0.000104383	0.745528
SM(31:1)	SM	2.15267e-08	0.753512
PC(38:5)	PC	2.28903e-08	0.753703
Phe-Phe	AA	0.0385994	0.762157
PC(19:1/18:2)	PC	7.55905e-08	0.765494
PC(15:0/18:2)	PC	2.82493e-08	0.776883
DG(34:0)	DG	0.000446185	0.777379
PE(P-18:0/0:0)	LPE	1.0277e-06	0.785469
PE(P-16:0/18:2)	PE	0.000672651	0.790794
PC(20:3/0:0)	LPC	9.8202e-06	0.79086
Aspartic Acid	AA	2.12634e-05	0.797323
LPI(18:1)	LPI	4.7178e-06	0.804731
CMH(d18:1/22:0)	CMH	0.00667409	0.815427
PC(32:1)	PC	3.72306e-08	0.817523
TG(56:7)	TG	1.93782e-05	0.817538
PE(18:1/18:2)	PE	0.00347297	0.820363
PE(P-18:0/18:1)	PE	1.8832e-05	0.835929
Cer(d18:1/21:0)	Cer	2.07953e-07	0.849821
PC(37:2)	PC	3.7696e-06	0.850135
PC(18:1/0:0)	LPC	1.65944e-05	0.860947
TG(52:1)	TG	0.00580906	0.872231
PC(P-17:0/20:4)	PC	6.77377e-08	0.873008
PC(18:2/18:2)	PC	0.00396988	0.88743
DG(32:0)	DG	0.0019375	0.902293
LPC(22:1)	LPC	0.00034395	0.92054
PC(P-16:0/14:0)	PC	3.31736e-11	0.925478
PC(18:3/0:0)	LPC	1.14591e-07	0.933817
TG(51:2)	TG	8.21011e-08	0.939016
PC(15:0/22:6)	PC	1.35648e-08	0.94216
TG(56:8)	TG	0.000214128	0.943011
PC(17:1/18:1)	PC	1.74767e-12	0.949506
TG(60:3)	TG	0.00580906	0.950315
PE(20:5/0:0)	LPE	3.0645e-06	0.952524
PE(P-20:1/0:0)	LPE	0.00227895	0.958028
Cer(d43:1)	Cer	1.79907e-10	0.962522
TG(53:2)	TG	2.2003e-07	0.963052
PC(22:5/0:0)	LPC	3.14489e-10	0.966788
PC(0:0/22:5)	LPC	1.95409e-13	0.977326
PE(18:3/0:0)	LPE	0.000189527	0.990545
PC(16:0/19:1)	PC	1.05711e-19	0.997604
PC(O-16:0/14:0)	PC	6.2567e-12	1.00455
TG(49:3)	TG	9.07306e-11	1.0276
TG(55:3)	TG	4.392e-08	1.04657
DG(32:1)	DG	8.2039e-06	1.05549
PE(O-16:0/18:1)	PE	2.97286e-10	1.06345
Gly-Gly	AA	3.41252e-05	1.0637
TG(45:0)	TG	5.01298e-09	1.07666
TG(48:0)	TG	2.80551e-05	1.077
PC(20:5/0:0)	LPC	1.06617e-10	1.09029
Cholic acid	BA	0.0435672	1.09186
LPE(20:5)	LPE	1.08599e-07	1.0924
PC(33:1)	PC	3.2052e-22	1.09807
TG(49:2)	TG	3.31736e-11	1.11917
PC(18:2/0:0)	LPC	2.23998e-11	1.14252
PC(37:5)	PC	5.27539e-20	1.17656
PC(22:4/0:0)	LPC	4.67844e-10	1.20514
TG(50:5)	TG	5.95857e-05	1.23705
ChoE(22:5)	ChoE	0.000962222	1.25664
Taurodeoxycholic acid	BA	0.0268463	1.26745
TG(56:2)	TG	0.000328154	1.2707
PC(34:3)	PC	5.66014e-13	1.27107
TG(48:2)	TG	3.81178e-08	1.27116
TG(45:1)	TG	1.93513e-11	1.28567
TG(60:2)	TG	4.8175e-06	1.28895
TG(50:0)	TG	8.6582e-06	1.29244
TG(47:2)	TG	5.28301e-14	1.30543
TG(47:1)	TG	1.93696e-13	1.33961
TG(58:2)	TG	0.000501675	1.34682
TG(48:1)	TG	3.08006e-09	1.35011
TG(48:3)	TG	8.93659e-07	1.35127
PC(16:0/20:5)	PC	8.43014e-12	1.37646
TG(58:1)	TG	8.99696e-08	1.3773
TG(49:0)	TG	3.31736e-11	1.39323
TG(49:1)	TG	4.80775e-13	1.4146
TG(55:2)	TG	1.06617e-10	1.42336
TG(51:1)	TG	3.15157e-11	1.42459
ChoE(20:5)	ChoE	0.00184772	1.46296
PC(0:0/20:5)	LPC	1.63955e-13	1.50174
PE(20:5/16:0)	PE	1.01672e-11	1.53121
TG(54:0)	TG	4.35688e-09	1.61904
TG(53:1)	TG	4.26597e-10	1.66571
TG(56:1)	TG	5.79075e-08	1.67936
TG(47:0)	TG	2.56584e-18	1.68246
PC(16:0/17:0)	PC	6.70433e-29	1.68774
Chenodeoxycholic acid	BA	0.0053027	1.74075
PC(0:0/18:3)	LPC	2.4134e-22	1.74823
TG(54:1)	TG	1.23325e-05	1.76259
TG(46:0)	TG	1.56997e-11	1.80578
Glycocholic acid	BA	1.03363e-08	1.84535
PC(30:0)	PC	1.50518e-18	1.90088
TG(52:0)	TG	4.99872e-08	1.92292
PC(14:0/14:0)	PC	7.79795e-15	1.98171
TG(46:1)	TG	9.98421e-12	2.06528
TG(46:2)	TG	3.74045e-11	2.07337
Glycochenodeoxycholic acid	BA	1.1211e-06	2.12122
TG(44:0)	TG	3.03983e-13	2.3638
TG(44:1)	TG	1.77711e-13	3.1995
Taurochenodeoxycholic acid	BA	1.28336e-05	3.36945
TG(40:0)	TG	1.41048e-10	3.70388
TG(42:0)	TG	1.6076e-12	3.80467
Taurocholic acid	BA	3.75692e-07	4.20407
		q val

## Sheet: Supp. Tab. 3
Supp. Table 1 A					Supp. Table 1B							Supp. Table 1C
Metabolite name	Metabolic class	FDR (q val)	Log2 FC (MAFLD-HCC/AV-HCC)		Pathways downregulated in MAFLD-HCC compared to AV-HCC							Pathways upregulated in MAFLD-HCC compared to AV-HCC
PUFA(14:2n-x)	PUFA	3.13311e-17	-3.52755		pathway_name	pathway_source	num_overlapping_metabolites	overlapping_metabolites	num_all_pathway_metabolites	P_metabolites		pathway_name	pathway_source	num_overlapping_metabolites	overlapping_metabolites	num_all_pathway_metabolites	P_metabolites
PUFA(16:3n-x)	PUFA	3.08016e-17	-3.01247		Linoleic acid metabolism - Homo sapiens (human)	KEGG	6	HMDB08270#HMDB08039;HMDB03073;HMDB01043;HMDB04705;HMDB04704;HMDB00673	6 (28)	0.00415		Immune System	Reactome	5	HMDB04951#HMDB04952#HMDB04950#HMDB04956#HMDB04957;HMDB06729#HMDB06726#HMDB10370;HMDB09012#HMDB09451#HMDB08946;HMDB05393;HMDB07874#HMDB07958#HMDB08056#HMDB07984#HMDB08206#HMDB07883#HMDB07982#HMDB07940#HMDB07949#HMDB08147#HMDB07991	6 (136)	0.000235
MUFA(14:1n-x)	MUFA	2.717e-14	-2.95393		The canonical retinoid cycle in rods (twilight vision)	Reactome	5	HMDB00220;HMDB00673;HMDB00207;HMDB00827;HMDB09060	5 (33)	0.0111		Glycerophospholipid metabolism	EHMN	5	HMDB12108#HMDB10379#HMDB10397;HMDB06729#HMDB06726#HMDB10370;HMDB09012#HMDB09451#HMDB08946;HMDB05393;HMDB07874#HMDB07958#HMDB08056#HMDB07984#HMDB08206#HMDB07883#HMDB07982#HMDB07940#HMDB07949#HMDB08147#HMDB07991	6 (96)	0.000235
9,10-DiHOME	oxFA	3.468e-07	-2.49667		sphingosine and sphingosine-1-phosphate metabolism	HumanCyc	9	HMDB00220;HMDB00827;HMDB00638;HMDB03073;HMDB00277;HMDB01043;HMDB00673;HMDB00207;HMDB02183	12 (59)	0.0137		Vesicle-mediated transport	Reactome	4	HMDB12108#HMDB10379#HMDB10397;HMDB06729#HMDB06726#HMDB10370;HMDB05393;HMDB07874#HMDB07958#HMDB08056#HMDB07984#HMDB08206#HMDB07883#HMDB07982#HMDB07940#HMDB07949#HMDB08147#HMDB07991	4 (66)	0.000402
Taurochenodeoxycholic acid	BA	0.0350222	-2.32683		G alpha (i) signalling events	Reactome	9	HMDB12108#HMDB10384#HMDB10395#HMDB10390#HMDB10382;HMDB09060;HMDB00220;HMDB00827;HMDB08270#HMDB08039;HMDB00277;HMDB01043;HMDB00673;HMDB00207	12 (159)	0.0137		Membrane Trafficking	Reactome	4	HMDB12108#HMDB10379#HMDB10397;HMDB06729#HMDB06726#HMDB10370;HMDB05393;HMDB07874#HMDB07958#HMDB08056#HMDB07984#HMDB08206#HMDB07883#HMDB07982#HMDB07940#HMDB07949#HMDB08147#HMDB07991	4 (30)	0.000402
PUFA(16:3n-x)	PUFA	2.59701e-12	-2.31908		Sphingolipid de novo biosynthesis	Reactome	6	HMDB09060;HMDB00220;HMDB00827;HMDB08270#HMDB08039;HMDB00277;HMDB10169	7 (35)	0.02		HDL remodeling	Reactome	4	HMDB12108#HMDB10379#HMDB10397;HMDB06729#HMDB06726#HMDB10370;HMDB05393;HMDB07874#HMDB07958#HMDB08056#HMDB07984#HMDB08206#HMDB07883#HMDB07982#HMDB07940#HMDB07949#HMDB08147#HMDB07991	4 (17)	0.000402
Glycocholic acid	BA	0.0008636	-2.26815		Linoleate metabolism	EHMN	4	HMDB03073;HMDB12108#HMDB10384#HMDB10395#HMDB10390#HMDB10382;HMDB00673;HMDB08270#HMDB08039	4 (24)	0.0286		Plasma lipoprotein remodeling	Reactome	4	HMDB12108#HMDB10379#HMDB10397;HMDB06729#HMDB06726#HMDB10370;HMDB05393;HMDB07874#HMDB07958#HMDB08056#HMDB07984#HMDB08206#HMDB07883#HMDB07982#HMDB07940#HMDB07949#HMDB08147#HMDB07991	4 (20)	0.000402
x-HODE	oxFA	3.56696e-10	-2.16784		Visual phototransduction	Wikipathways	4	HMDB00220;HMDB00673;HMDB00207;HMDB09060	4 (57)	0.0286		Plasma lipoprotein assembly_ remodeling_ and clearance	Reactome	4	HMDB12108#HMDB10379#HMDB10397;HMDB06729#HMDB06726#HMDB10370;HMDB05393;HMDB07874#HMDB07958#HMDB08056#HMDB07984#HMDB08206#HMDB07883#HMDB07982#HMDB07940#HMDB07949#HMDB08147#HMDB07991	4 (25)	0.000402
Glycodeoxycholic acid	BA	4.43299e-05	-1.94845		triacylglycerol degradation	HumanCyc	8	HMDB00220;HMDB00827;HMDB00638;HMDB03073;HMDB01043;HMDB00673;HMDB00207;HMDB02183	11 (54)	0.0294		Glycerophospholipid biosynthesis	Reactome	4	HMDB12108#HMDB10379#HMDB10397;HMDB09012#HMDB09451#HMDB08946;HMDB05393;HMDB07874#HMDB07958#HMDB08056#HMDB07984#HMDB08206#HMDB07883#HMDB07982#HMDB07940#HMDB07949#HMDB08147#HMDB07991	4 (93)	0.000402
Deoxycholic acid	BA	0.00699169	-1.94064		phospholipases	HumanCyc	8	HMDB00220;HMDB00827;HMDB00638;HMDB03073;HMDB01043;HMDB00673;HMDB00207;HMDB02183	11 (55)	0.0294		Phospholipid metabolism	Reactome	4	HMDB12108#HMDB10379#HMDB10397;HMDB09012#HMDB09451#HMDB08946;HMDB05393;HMDB07874#HMDB07958#HMDB08056#HMDB07984#HMDB08206#HMDB07883#HMDB07982#HMDB07940#HMDB07949#HMDB08147#HMDB07991	4 (103)	0.000402
16:1n-9	MUFA	2.2909e-06	-1.85862		the visual cycle I (vertebrates)	HumanCyc	8	HMDB00220;HMDB00827;HMDB00638;HMDB03073;HMDB01043;HMDB00673;HMDB00207;HMDB02183	11 (58)	0.0294		Glycerophospholipid biosynthesis	Wikipathways	4	HMDB12108#HMDB10379#HMDB10397;HMDB05393;HMDB09012#HMDB09451#HMDB08946;HMDB07874#HMDB07958#HMDB08056#HMDB07984#HMDB08206#HMDB07883#HMDB07982#HMDB07940#HMDB07949#HMDB08147#HMDB07991	4 (94)	0.000402
AC(18:2n-6)	AC	2.0536e-11	-1.73279		sphingomyelin metabolism/ceramide salvage	HumanCyc	8	HMDB00220;HMDB00827;HMDB00638;HMDB03073;HMDB01043;HMDB00673;HMDB00207;HMDB02183	11 (55)	0.0294		Plasma lipoprotein assembly_ remodeling_ and clearance	Wikipathways	4	HMDB12108#HMDB10379#HMDB10397;HMDB06729#HMDB06726#HMDB10370;HMDB05393;HMDB07874#HMDB07958#HMDB08056#HMDB07984#HMDB08206#HMDB07883#HMDB07982#HMDB07940#HMDB07949#HMDB08147#HMDB07991	4 (21)	0.000402
x-OxoODE	oxFA	1.27777e-07	-1.71913		Alpha Linolenic Acid and Linoleic Acid Metabolism	SMPDB	8	HMDB06547;HMDB02226;HMDB08270#HMDB08039;HMDB03073;HMDB01043;HMDB01976;HMDB00673;HMDB02183	11 (18)	0.0294		MTHFR deficiency	Wikipathways	4	HMDB04951#HMDB04952#HMDB04950#HMDB04956#HMDB04957;HMDB12105#HMDB12087#HMDB12085#HMDB12096#HMDB01348;HMDB09012#HMDB09451#HMDB08946;HMDB07874#HMDB07958#HMDB08056#HMDB07984#HMDB08206#HMDB07883#HMDB07982#HMDB07940#HMDB07949#HMDB08147#HMDB07991	5 (20)	0.00184
Taurodeoxycholic acid	BA	0.00246366	-1.70104		Biosynthesis of unsaturated fatty acids - Homo sapiens (human)	KEGG	9	HMDB02368;HMDB00220;HMDB02226;HMDB00827;HMDB03073;HMDB01043;HMDB00673;HMDB00207;HMDB02183	13 (55)	0.031		Oligodendrocyte Specification and differentiation(including remyelination)_ leading to Myelin Components for CNS	Wikipathways	3	HMDB12105#HMDB12087#HMDB12085#HMDB12096#HMDB01348;HMDB09012#HMDB09451#HMDB08946;HMDB07874#HMDB07958#HMDB08056#HMDB07984#HMDB08206#HMDB07883#HMDB07982#HMDB07940#HMDB07949#HMDB08147#HMDB07991	3 (11)	0.00333
Tauroursodeoxycholic + Taurohyodeoxycholic acid	BA	0.00556099	-1.65216		Transport of fatty acids	Reactome	5	HMDB00220;HMDB00673;HMDB00207;HMDB00827;HMDB00638	6 (10)	0.0456		Acyl chain remodeling of CL	Reactome	3	HMDB12108#HMDB10379#HMDB10397;HMDB09012#HMDB09451#HMDB08946;HMDB07874#HMDB07958#HMDB08056#HMDB07984#HMDB08206#HMDB07883#HMDB07982#HMDB07940#HMDB07949#HMDB08147#HMDB07991	3 (12)	0.00333
18:4n-3	PUFA	7.80488e-07	-1.58175									Glycerophospholipid metabolism - Homo sapiens (human)	KEGG	3	HMDB12108#HMDB10379#HMDB10397;HMDB09012#HMDB09451#HMDB08946;HMDB07874#HMDB07958#HMDB08056#HMDB07984#HMDB08206#HMDB07883#HMDB07982#HMDB07940#HMDB07949#HMDB08147#HMDB07991	3 (52)	0.00333
Pregnenolone sulfate	ST	8.48463e-05	-1.56192									Phospholipid Biosynthesis	SMPDB	3	HMDB12108#HMDB10379#HMDB10397;HMDB09012#HMDB09451#HMDB08946;HMDB07874#HMDB07958#HMDB08056#HMDB07984#HMDB08206#HMDB07883#HMDB07982#HMDB07940#HMDB07949#HMDB08147#HMDB07991	3 (24)	0.00333
16:2n-4,7	PUFA	3.7079e-11	-1.5557									Sphingolipid de novo biosynthesis	Reactome	4	HMDB04951#HMDB04952#HMDB04950#HMDB04956#HMDB04957;HMDB12105#HMDB12087#HMDB12085#HMDB12096#HMDB01348;HMDB09012#HMDB09451#HMDB08946;HMDB07874#HMDB07958#HMDB08056#HMDB07984#HMDB08206#HMDB07883#HMDB07982#HMDB07940#HMDB07949#HMDB08147#HMDB07991	7 (35)	0.0108
18:2n-6	PUFA	3.13028e-12	-1.53836									Transport of small molecules	Reactome	8	HMDB12108#HMDB10379#HMDB10397;HMDB00251;HMDB09012#HMDB09451#HMDB08946;HMDB12105#HMDB12087#HMDB12085#HMDB12096#HMDB01348;HMDB07874#HMDB07958#HMDB08056#HMDB07984#HMDB08206#HMDB07883#HMDB07982#HMDB07940#HMDB07949#HMDB08147#HMDB07991;HMDB00191;HMDB05393;HMDB06729#HMDB06726#HMDB10370	26 (226)	0.0116
22:5n-6	PUFA	1.44961e-10	-1.51186									Innate Immune System	Reactome	3	HMDB06729#HMDB06726#HMDB10370;HMDB05393;HMDB07874#HMDB07958#HMDB08056#HMDB07984#HMDB08206#HMDB07883#HMDB07982#HMDB07940#HMDB07949#HMDB08147#HMDB07991	4 (99)	0.0121
AC(10:0)	AC	1.42376e-08	-1.50433									G alpha (i) signalling events	Reactome	5	HMDB12108#HMDB10379#HMDB10397;HMDB06729#HMDB06726#HMDB10370;HMDB09012#HMDB09451#HMDB08946;HMDB05393;HMDB07874#HMDB07958#HMDB08056#HMDB07984#HMDB08206#HMDB07883#HMDB07982#HMDB07940#HMDB07949#HMDB08147#HMDB07991	12 (159)	0.0191
LPC(O-22:2)	LPC	0.00655397	-1.47308									Sphingolipid metabolism	Wikipathways	4	HMDB04951#HMDB04952#HMDB04950#HMDB04956#HMDB04957;HMDB12105#HMDB12087#HMDB12085#HMDB12096#HMDB01348;HMDB09012#HMDB09451#HMDB08946;HMDB07874#HMDB07958#HMDB08056#HMDB07984#HMDB08206#HMDB07883#HMDB07982#HMDB07940#HMDB07949#HMDB08147#HMDB07991	8 (67)	0.0197
PC(O-18:1/0:0)	LPC	0.000923981	-1.44038									One carbon metabolism and related pathways	Wikipathways	4	HMDB00965;HMDB00251;HMDB09012#HMDB09451#HMDB08946;HMDB07874#HMDB07958#HMDB08056#HMDB07984#HMDB08206#HMDB07883#HMDB07982#HMDB07940#HMDB07949#HMDB08147#HMDB07991	8 (42)	0.0197
PUFA(22:3n-x)	PUFA	2.45119e-07	-1.42806									Keratinization	Reactome	2	HMDB04951#HMDB04952#HMDB04950#HMDB04956#HMDB04957;HMDB05393	2 (9)	0.0246
Glycochenodeoxycholic acid	BA	0.0168644	-1.42399									p75 NTR receptor-mediated signalling	Wikipathways	2	HMDB04951#HMDB04952#HMDB04950#HMDB04956#HMDB04957;HMDB12105#HMDB12087#HMDB12085#HMDB12096#HMDB01348	2 (9)	0.0246
PC(O-20:2/0:0)	LPC	0.0414226	-1.40998									Chylomicron assembly	Reactome	2	HMDB06729#HMDB06726#HMDB10370;HMDB05393	2 (4)	0.0246
isomer pregn-5-ene-3,20-diol sulfate	ST	3.08077e-05	-1.335									VLDL assembly	Reactome	2	HMDB06729#HMDB06726#HMDB10370;HMDB05393	2 (4)	0.0246
PC(0:0/20:0)	LPC	3.62096e-10	-1.29884									Plasma lipoprotein assembly	Reactome	2	HMDB06729#HMDB06726#HMDB10370;HMDB05393	2 (11)	0.0246
PC(20:0/0:0)	LPC	3.36207e-09	-1.29858									Chylomicron remodeling	Reactome	2	HMDB06729#HMDB06726#HMDB10370;HMDB05393	2 (7)	0.0246
12,13-DiHOME	oxFA	0.000565063	-1.27962									LDL remodeling	Reactome	2	HMDB06729#HMDB06726#HMDB10370;HMDB05393	2 (4)	0.0246
DG(36:4)	DG	0.00364091	-1.27295									ABC transporters in lipid homeostasis	Reactome	2	HMDB12105#HMDB12087#HMDB12085#HMDB12096#HMDB01348;HMDB07874#HMDB07958#HMDB08056#HMDB07984#HMDB08206#HMDB07883#HMDB07982#HMDB07940#HMDB07949#HMDB08147#HMDB07991	2 (11)	0.0246
PE(0:0/20:3)	LPE	3.37895e-11	-1.24594									Toll-Like Receptors Cascades	Reactome	2	HMDB06729#HMDB06726#HMDB10370;HMDB05393	2 (29)	0.0246
22:4n-6	PUFA	1.92176e-05	-1.24454									Clathrin-mediated endocytosis	Reactome	2	HMDB06729#HMDB06726#HMDB10370;HMDB05393	2 (16)	0.0246
18:3n-6	PUFA	0.00017407	-1.23087									HDL clearance	Reactome	2	HMDB06729#HMDB06726#HMDB10370;HMDB05393	2 (4)	0.0246
PC(O-24:2/0:0)	LPC	0.00551447	-1.22655									Chylomicron clearance	Reactome	2	HMDB06729#HMDB06726#HMDB10370;HMDB05393	2 (4)	0.0246
24:1n-9	MUFA	3.39941e-07	-1.21756									LDL clearance	Reactome	2	HMDB06729#HMDB06726#HMDB10370;HMDB05393	2 (9)	0.0246
22:6n-3	PUFA	5.1041e-06	-1.21293									Immunoregulatory interactions between a Lymphoid and a non-Lymphoid cell	Reactome	2	HMDB04951#HMDB04952#HMDB04950#HMDB04956#HMDB04957;HMDB09012#HMDB09451#HMDB08946	2 (19)	0.0246
20:1n-6	MUFA	0.000333357	-1.1954									VLDL clearance	Reactome	2	HMDB06729#HMDB06726#HMDB10370;HMDB05393	2 (4)	0.0246
AC(14:2n-x)	AC	6.1143e-06	-1.17366									Plasma lipoprotein clearance	Reactome	2	HMDB06729#HMDB06726#HMDB10370;HMDB05393	2 (9)	0.0246
PC(O-20:1/0:0)	LPC	0.00623774	-1.16395									Adaptive Immune System	Reactome	2	HMDB04951#HMDB04952#HMDB04950#HMDB04956#HMDB04957;HMDB09012#HMDB09451#HMDB08946	2 (54)	0.0246
PE(0:0/18:2)	LPE	1.99478e-08	-1.14423									Cell surface interactions at the vascular wall	Wikipathways	2	HMDB06729#HMDB06726#HMDB10370;HMDB05393	2 (11)	0.0246
PUFA(22:3n-x)	PUFA	3.2734e-06	-1.12334									ceramide signaling pathway	BioCarta	2	HMDB04951#HMDB04952#HMDB04950#HMDB04956#HMDB04957;HMDB12105#HMDB12087#HMDB12085#HMDB12096#HMDB01348	2 (2)	0.0246
PC(20:1/0:0)	LPC	9.04521e-05	-1.12069									Insulin resistance - Homo sapiens (human)	KEGG	2	HMDB04951#HMDB04952#HMDB04950#HMDB04956#HMDB04957;HMDB05393	2 (21)	0.0246
AC(18:1n-9)	AC	0.00500488	-1.11768									Vitamin digestion and absorption - Homo sapiens (human)	KEGG	2	HMDB06729#HMDB06726#HMDB10370;HMDB05393	2 (39)	0.0246
LPC(22:0)	LPC	5.3881e-10	-1.11119									Synthesis of PC	Reactome	2	HMDB09012#HMDB09451#HMDB08946;HMDB07874#HMDB07958#HMDB08056#HMDB07984#HMDB08206#HMDB07883#HMDB07982#HMDB07940#HMDB07949#HMDB08147#HMDB07991	2 (28)	0.0246
PC(O-18:1/18:2)	PC	2.21907e-08	-1.09807									Lipid particle organization	Reactome	2	HMDB06729#HMDB06726#HMDB10370;HMDB05393	2 (3)	0.0246
AC(16:0)	AC	6.38384e-10	-1.09165									Choline metabolism in cancer - Homo sapiens (human)	KEGG	2	HMDB12108#HMDB10379#HMDB10397;HMDB07874#HMDB07958#HMDB08056#HMDB07984#HMDB08206#HMDB07883#HMDB07982#HMDB07940#HMDB07949#HMDB08147#HMDB07991	2 (11)	0.0246
PC(O-24:1/0:0)	LPC	0.000859917	-1.08998									taurine biosynthesis	HumanCyc	2	HMDB00965;HMDB00251	2 (11)	0.0246
PC(0:0/18:1)	LPC	3.62096e-10	-1.08687									Triglyceride catabolism	Reactome	2	HMDB06729#HMDB06726#HMDB10370;HMDB05393	2 (19)	0.0246
PE(P-18:2/0:0)	LPE	0.00864905	-1.08652									Triglyceride metabolism	Reactome	2	HMDB06729#HMDB06726#HMDB10370;HMDB05393	2 (28)	0.0246
PC(O-22:1/0:0)	LPC	0.0123741	-1.08465									Acyl chain remodelling of PC	Reactome	2	HMDB12108#HMDB10379#HMDB10397;HMDB07874#HMDB07958#HMDB08056#HMDB07984#HMDB08206#HMDB07883#HMDB07982#HMDB07940#HMDB07949#HMDB08147#HMDB07991	2 (13)	0.0246
x-HODE	oxFA	1.90718e-05	-1.08395									ABC-family proteins mediated transport	Reactome	2	HMDB12105#HMDB12087#HMDB12085#HMDB12096#HMDB01348;HMDB07874#HMDB07958#HMDB08056#HMDB07984#HMDB08206#HMDB07883#HMDB07982#HMDB07940#HMDB07949#HMDB08147#HMDB07991	2 (21)	0.0246
PC(0:0/18:2)	LPC	1.26929e-08	-1.02407									Cell surface interactions at the vascular wall	Reactome	2	HMDB06729#HMDB06726#HMDB10370;HMDB05393	2 (13)	0.0246
18:1n-9	MUFA	1.55614e-05	-1.00476									Fat digestion and absorption - Homo sapiens (human)	KEGG	2	HMDB06729#HMDB06726#HMDB10370;HMDB05393	2 (13)	0.0246
PC(19:0/0:0)	LPC	7.00911e-05	-0.96641									Regulation of TLR by endogenous ligand	Reactome	2	HMDB06729#HMDB06726#HMDB10370;HMDB05393	2 (12)	0.0246
LPI(18:1)	LPI	0.000114708	-0.963764									Ceramide signalling	Reactome	2	HMDB04951#HMDB04952#HMDB04950#HMDB04956#HMDB04957;HMDB12105#HMDB12087#HMDB12085#HMDB12096#HMDB01348	2 (5)	0.0246
PC(O-18:1/22:4)	PC	1.78657e-09	-0.954838									p75 NTR receptor-mediated signalling	Reactome	2	HMDB04951#HMDB04952#HMDB04950#HMDB04956#HMDB04957;HMDB12105#HMDB12087#HMDB12085#HMDB12096#HMDB01348	2 (9)	0.0246
PE(22:4/0:0)	LPE	0.000194247	-0.953143									Death Receptor Signalling	Reactome	2	HMDB04951#HMDB04952#HMDB04950#HMDB04956#HMDB04957;HMDB12105#HMDB12087#HMDB12085#HMDB12096#HMDB01348	2 (11)	0.0246
PE(18:3/0:0)	LPE	0.00776493	-0.94262									COPI-independent Golgi-to-ER retrograde traffic	Reactome	2	HMDB12108#HMDB10379#HMDB10397;HMDB07874#HMDB07958#HMDB08056#HMDB07984#HMDB08206#HMDB07883#HMDB07982#HMDB07940#HMDB07949#HMDB08147#HMDB07991	2 (8)	0.0246
20:4n-3	PUFA	0.0376921	-0.932575									Golgi-to-ER retrograde transport	Reactome	2	HMDB12108#HMDB10379#HMDB10397;HMDB07874#HMDB07958#HMDB08056#HMDB07984#HMDB08206#HMDB07883#HMDB07982#HMDB07940#HMDB07949#HMDB08147#HMDB07991	2 (10)	0.0246
PE(0:0/18:1)	LPE	3.19091e-07	-0.930069									Cargo recognition for clathrin-mediated endocytosis	Reactome	2	HMDB06729#HMDB06726#HMDB10370;HMDB05393	2 (10)	0.0246
20:4n-6	PUFA	0.00601221	-0.904119									Synthesis of PS	Reactome	2	HMDB09012#HMDB09451#HMDB08946;HMDB07874#HMDB07958#HMDB08056#HMDB07984#HMDB08206#HMDB07883#HMDB07982#HMDB07940#HMDB07949#HMDB08147#HMDB07991	2 (6)	0.0246
LPI(20:3)	LPI	0.00106806	-0.894193									Acyl chain remodelling of PE	Reactome	2	HMDB09012#HMDB09451#HMDB08946;HMDB07874#HMDB07958#HMDB08056#HMDB07984#HMDB08206#HMDB07883#HMDB07982#HMDB07940#HMDB07949#HMDB08147#HMDB07991	2 (13)	0.0246
PC(O-38:4)	PC	5.41125e-08	-0.888589									Scavenging by Class B Receptors	Reactome	2	HMDB06729#HMDB06726#HMDB10370;HMDB05393	2 (15)	0.0246
PC(0:0/18:0)	LPC	2.95036e-07	-0.880818									Intra-Golgi and retrograde Golgi-to-ER traffic	Reactome	2	HMDB12108#HMDB10379#HMDB10397;HMDB07874#HMDB07958#HMDB08056#HMDB07984#HMDB08206#HMDB07883#HMDB07982#HMDB07940#HMDB07949#HMDB08147#HMDB07991	2 (12)	0.0246
isomer Dehydroepiandrosterone sulfate (DHEAS)	ST	0.0135713	-0.860332									Scavenging by Class H Receptors	Reactome	2	HMDB06729#HMDB06726#HMDB10370;HMDB05393	2 (11)	0.0246
NAE(18:1n-9)	NAE	0.000923981	-0.857517									Binding and Uptake of Ligands by Scavenger Receptors	Reactome	2	HMDB06729#HMDB06726#HMDB10370;HMDB05393	2 (41)	0.0246
MUFA(17:1n-x)	MUFA	0.00495794	-0.856506									Taurine and Hypotaurine Metabolism	SMPDB	2	HMDB00965;HMDB00251	2 (12)	0.0246
PE(18:2/0:0)	LPE	9.12283e-05	-0.851392									Scavenging by Class A Receptors	Reactome	2	HMDB06729#HMDB06726#HMDB10370;HMDB05393	2 (29)	0.0246
PE(22:5/0:0)	LPE	0.00185103	-0.841047									Platelet sensitization by LDL	Reactome	2	HMDB06729#HMDB06726#HMDB10370;HMDB05393	2 (6)	0.0246
LPI(18:2)	LPI	0.000936072	-0.837543									ABC-family proteins mediated transport	Wikipathways	2	HMDB12105#HMDB12087#HMDB12085#HMDB12096#HMDB01348;HMDB07874#HMDB07958#HMDB08056#HMDB07984#HMDB08206#HMDB07883#HMDB07982#HMDB07940#HMDB07949#HMDB08147#HMDB07991	2 (22)	0.0246
PE(22:6/0:0)	LPE	6.65077e-05	-0.810434									Scavenging by Class F Receptors	Reactome	2	HMDB06729#HMDB06726#HMDB10370;HMDB05393	2 (9)	0.0246
PE(P-20:0/0:0)	LPE	0.00623774	-0.801972									Immunoregulatory interactions between a Lymphoid and a non-Lymphoid cell	Wikipathways	2	HMDB04951#HMDB04952#HMDB04950#HMDB04956#HMDB04957;HMDB09012#HMDB09451#HMDB08946	2 (19)	0.0246
PC(0:0/20:1)	LPC	0.00791615	-0.799598									Binding and Uptake of Ligands by Scavenger Receptors	Wikipathways	2	HMDB06729#HMDB06726#HMDB10370;HMDB05393	2 (35)	0.0246
PC(O-34:1)	PC	6.1481e-07	-0.788034									Formation of the cornified envelope	Reactome	2	HMDB04951#HMDB04952#HMDB04950#HMDB04956#HMDB04957;HMDB05393	2 (9)	0.0246
NAE(18:0)	NAE	4.59458e-05	-0.769116									Amino acid synthesis and interconversion (transamination)	Wikipathways	2	HMDB00965;HMDB00251	2 (40)	0.0246
isomer androsterone sulfate	ST	0.0382791	-0.765565									Sulfur amino acid metabolism	Wikipathways	2	HMDB00965;HMDB00251	2 (67)	0.0246
LPI(18:1)	LPI	0.0484387	-0.750783									Composition of Lipid Particles	Wikipathways	2	HMDB06729#HMDB06726#HMDB10370;HMDB05393	2 (10)	0.0246
SFA(12:0)	SFA	0.00843894	-0.740799									Intra-Golgi and retrograde Golgi-to-ER traffic	Wikipathways	2	HMDB12108#HMDB10379#HMDB10397;HMDB07874#HMDB07958#HMDB08056#HMDB07984#HMDB08206#HMDB07883#HMDB07982#HMDB07940#HMDB07949#HMDB08147#HMDB07991	2 (12)	0.0246
LPI(22:6)	LPI	0.0189353	-0.737581									Lipid particle organization	Wikipathways	2	HMDB06729#HMDB06726#HMDB10370;HMDB05393	2 (3)	0.0246
PE(22:5/0:0)	LPE	0.000809897	-0.695841									Clathrin-mediated endocytosis	Wikipathways	2	HMDB06729#HMDB06726#HMDB10370;HMDB05393	2 (15)	0.0246
PC(P-16:0/18:1)	PC	5.27266e-05	-0.673102									Regulation of TLR by endogenous ligand	Wikipathways	2	HMDB06729#HMDB06726#HMDB10370;HMDB05393	2 (12)	0.0246
SFA(18:0)	SFA	0.00115374	-0.665017									Cargo recognition for clathrin-mediated endocytosis	Wikipathways	2	HMDB06729#HMDB06726#HMDB10370;HMDB05393	2 (9)	0.0246
PC(18:2/0:0)	LPC	8.48463e-05	-0.654671									Keratinization	Wikipathways	2	HMDB04951#HMDB04952#HMDB04950#HMDB04956#HMDB04957;HMDB05393	2 (9)	0.0246
Sphingosine-1-phosphate	FSB	0.000115899	-0.629378									Triglyceride metabolism	Wikipathways	2	HMDB06729#HMDB06726#HMDB10370;HMDB05393	2 (30)	0.0246
PUFA(20:3n-x)	PUFA	0.0282108	-0.618264									Sphingolipid Metabolism	SMPDB	3	HMDB04951#HMDB04952#HMDB04950#HMDB04956#HMDB04957;HMDB12105#HMDB12087#HMDB12085#HMDB12096#HMDB01348;HMDB07874#HMDB07958#HMDB08056#HMDB07984#HMDB08206#HMDB07883#HMDB07982#HMDB07940#HMDB07949#HMDB08147#HMDB07991	5 (40)	0.0276
PC(P-16:0/18:2)	PC	6.71421e-05	-0.602892									Gaucher Disease	SMPDB	3	HMDB04951#HMDB04952#HMDB04950#HMDB04956#HMDB04957;HMDB12105#HMDB12087#HMDB12085#HMDB12096#HMDB01348;HMDB07874#HMDB07958#HMDB08056#HMDB07984#HMDB08206#HMDB07883#HMDB07982#HMDB07940#HMDB07949#HMDB08147#HMDB07991	5 (40)	0.0276
PC(17:0/0:0)	LPC	0.00631015	-0.602729									Globoid Cell Leukodystrophy	SMPDB	3	HMDB04951#HMDB04952#HMDB04950#HMDB04956#HMDB04957;HMDB12105#HMDB12087#HMDB12085#HMDB12096#HMDB01348;HMDB07874#HMDB07958#HMDB08056#HMDB07984#HMDB08206#HMDB07883#HMDB07982#HMDB07940#HMDB07949#HMDB08147#HMDB07991	5 (40)	0.0276
PC(0:0/22:5)	LPC	0.00678523	-0.600759									Metachromatic Leukodystrophy (MLD)	SMPDB	3	HMDB04951#HMDB04952#HMDB04950#HMDB04956#HMDB04957;HMDB12105#HMDB12087#HMDB12085#HMDB12096#HMDB01348;HMDB07874#HMDB07958#HMDB08056#HMDB07984#HMDB08206#HMDB07883#HMDB07982#HMDB07940#HMDB07949#HMDB08147#HMDB07991	5 (40)	0.0276
SFA(16:0)	SFA	0.0113508	-0.592532									Fabry disease	SMPDB	3	HMDB04951#HMDB04952#HMDB04950#HMDB04956#HMDB04957;HMDB12105#HMDB12087#HMDB12085#HMDB12096#HMDB01348;HMDB07874#HMDB07958#HMDB08056#HMDB07984#HMDB08206#HMDB07883#HMDB07982#HMDB07940#HMDB07949#HMDB08147#HMDB07991	5 (40)	0.0276
PI(18:0/20:3)	PI	5.37454e-05	-0.592217									Krabbe disease	SMPDB	3	HMDB04951#HMDB04952#HMDB04950#HMDB04956#HMDB04957;HMDB12105#HMDB12087#HMDB12085#HMDB12096#HMDB01348;HMDB07874#HMDB07958#HMDB08056#HMDB07984#HMDB08206#HMDB07883#HMDB07982#HMDB07940#HMDB07949#HMDB08147#HMDB07991	5 (40)	0.0276
PC(O-22:1/20:4)	PC	0.00066997	-0.579332									Sphingolipid metabolism	Reactome	4	HMDB04951#HMDB04952#HMDB04950#HMDB04956#HMDB04957;HMDB12105#HMDB12087#HMDB12085#HMDB12096#HMDB01348;HMDB09012#HMDB09451#HMDB08946;HMDB07874#HMDB07958#HMDB08056#HMDB07984#HMDB08206#HMDB07883#HMDB07982#HMDB07940#HMDB07949#HMDB08147#HMDB07991	9 (68)	0.0323
PC(0:0/17:1)	LPC	0.00691711	-0.578552									Metabolism	Reactome	10	HMDB12108#HMDB10379#HMDB10397;HMDB00251;HMDB09012#HMDB09451#HMDB08946;HMDB04951#HMDB04952#HMDB04950#HMDB04956#HMDB04957;HMDB07874#HMDB07958#HMDB08056#HMDB07984#HMDB08206#HMDB07883#HMDB07982#HMDB07940#HMDB07949#HMDB08147#HMDB07991;HMDB00191;HMDB05393;HMDB00965;HMDB06729#HMDB06726#HMDB10370;HMDB12105#HMDB12087#HMDB12085#HMDB12096#HMDB01348	45 (1384)	0.0354
PC(O-22:0/0:0)	LPC	0.0292029	-0.572841									Metabolism of lipids	Reactome	8	HMDB12108#HMDB10379#HMDB10397;HMDB00251;HMDB09012#HMDB09451#HMDB08946;HMDB04951#HMDB04952#HMDB04950#HMDB04956#HMDB04957;HMDB07874#HMDB07958#HMDB08056#HMDB07984#HMDB08206#HMDB07883#HMDB07982#HMDB07940#HMDB07949#HMDB08147#HMDB07991;HMDB12105#HMDB12087#HMDB12085#HMDB12096#HMDB01348;HMDB05393;HMDB06729#HMDB06726#HMDB10370	31 (620)	0.0453
PE(18:1/0:0)	LPE	0.000780154	-0.556173
PC(O-38:5)	PC	2.72834e-05	-0.552356
PC(O-24:1/20:4)	PC	0.00380242	-0.536641
PC(O-16:0/16:0)	PC	0.000173733	-0.535056
PC(P-36:2)	PC	0.000519772	-0.510649
PE(0:0/16:0)	LPE	0.00141818	-0.496742
PI(18:0/20:4)	PI	0.0418543	-0.485167
PE(0:0/20:4)	LPE	0.000502952	-0.475668
PC(O-16:0/18:2)	PC	0.0209783	-0.46696
PC(20:0/18:2)	PC	1.64707e-05	-0.466911
PC(0:0/20:4)	LPC	0.0192119	-0.460195
PE(16:0/0:0)	LPE	0.00411037	-0.455036
PE(16:1e/20:3)	PE	0.00735677	-0.433985
PC(0:0/22:4)	LPC	0.0347519	-0.432546
PE(18:1/18:2)	PE	0.00932339	-0.426
TG(54:4)	TG	0.00803285	-0.403218
PC(P-16:0/16:0)	PC	0.0440688	-0.399342
PC(37:2)	PC	0.0145871	-0.396616
PC(16:0/0:0)	LPC	0.000886626	-0.378227
TG(54:3)	TG	0.00228229	-0.366061
TG(56:8)	TG	0.0294982	-0.355713
PC(O-16:0/22:4)	PC	0.0164761	-0.344613
PE(P-16:0/18:2)	PE	0.0382791	-0.343239
PC(18:0/0:0)	LPC	0.0127603	-0.34211
PE(20:4/0:0)	LPE	0.0362457	-0.335819
PC(0:0/16:0)	LPC	0.0125434	-0.335082
PE(14:0/0:0)	LPE	0.0115583	-0.329878
PC(18:0/18:2)	PC	0.00357826	-0.253034
SM(d18:1/16:0)	SM	0.0101351	-0.23476
CMH(d18:1/24:0)	CMH	0.0392949	-0.144231
ChoE(20:3)	ChoE	0.011777	-0.0489931
TG(58:8)	TG	0.0294982	0.149801
TG(56:8)	TG	0.00741552	0.162911
SM(d18:0/14:0)	SM	0.011777	0.192912
PC(0:0/14:0)	LPC	0.0145871	0.193822
PE(16:0/22:6)	PE	0.0310552	0.196444
ChoE(18:3)	ChoE	2.36733e-07	0.20607
ChoE(20:4)	ChoE	4.68225e-11	0.225754
SM(d18:1/18:0)	SM	0.0142006	0.232102
SM(d18:1/23:0)	SM	0.0168008	0.241282
PC(16:0/20:4)	PC	0.00172219	0.248948
PC(14:0/0:0)	LPC	0.00149393	0.258579
PE(18:2e/22:6)	PE	0.0373602	0.266138
SM(d18:2/22:0)	SM	0.00656297	0.266488
PC(16:0/22:6)	PC	0.00290515	0.267533
PE(18:0/22:6)	PE	0.00730621	0.269009
SM(38:1)	SM	0.00566487	0.269329
PC(38:5)	PC	0.000763096	0.270197
TG(50:3)	TG	0.0462962	0.270229
TG(53:3)	TG	0.0489942	0.270883
DG(38:4)	DG	0.0382791	0.282196
SM(d18:1/25:0)	SM	0.00623774	0.296832
PC(0:0/20:3)	LPC	0.00601221	0.298186
ChoE(22:4)	ChoE	0.00606307	0.299953
SM(32:1)	SM	0.000217189	0.301347
PC(18:2/20:4)	PC	0.0410782	0.30495
TG(53:4)	TG	0.0448704	0.309529
PC(14:0/18:2)	PC	0.0170665	0.323658
PC(P-18:0/20:4)	PC	0.00030709	0.339924
TG(54:6)	TG	0.0139827	0.347887
SM(d18:0/18:0)	SM	0.0214752	0.349706
SM(d18:2/14:0)	SM	0.000435092	0.350612
SM(d18:1/12:0)	SM	0.00139222	0.351536
PC(16:0/19:1)	PC	0.00018645	0.360223
Aspartic Acid	AA	0.00274792	0.364556
PE(P-18:0/0:0)	LPE	0.00601221	0.376375
SM(33:1)	SM	9.12283e-05	0.377516
PC(15:0/18:2)	PC	0.00486783	0.384868
Hypotaurine	AA	0.00828165	0.386719
TG(52:5)	TG	0.0407565	0.387823
SM(38:0)	SM	0.00973446	0.387943
TG(50:2)	TG	0.00387058	0.38818
TG(50:1)	TG	0.00862584	0.391709
PC(22:4/0:0)	LPC	0.00163774	0.395282
SM(d16:1/24:1)	SM	6.18999e-05	0.403798
PC(P-16:0/20:4)	PC	4.81475e-05	0.420281
DG(32:1)	DG	0.0135713	0.425625
PC(P-17:0/20:4)	PC	0.00505004	0.429049
PC(18:0/22:5)	PC	9.04521e-05	0.429192
PC(33:1)	PC	5.13067e-05	0.441122
TG(54:5)	TG	0.0130657	0.444155
TG(53:0)	TG	3.29357e-05	0.459442
SM(d18:1/23:1)	SM	0.000338977	0.463873
SM(39:1)	SM	5.95258e-05	0.465439
TG(52:4)	TG	0.0260758	0.472419
TG(60:2)	TG	0.0489942	0.479121
PC(34:3)	PC	0.00309321	0.481429
TG(50:4)	TG	0.0253042	0.484962
Cer(d18:1/24:1)+Cer(d18:2/24:0)	Cer	9.04521e-05	0.497733
Cer(d18:1/18:0)	Cer	0.000497523	0.510693
TG(51:2)	TG	0.00150717	0.51329
Cer(d18:1/24:0)	Cer	0.000105513	0.543347
Cer(d18:1/20:0)	Cer	0.000711774	0.550585
PC(30:0)	PC	0.000748716	0.553794
TG(48:2)	TG	0.00673408	0.558244
PE(O-16:0/18:1)	PE	0.000427945	0.559034
PE(20:5/16:0)	PE	0.000157892	0.559858
Taurine	AA	0.000133303	0.565928
TG(58:5)	TG	0.00699169	0.569617
TG(49:3)	TG	0.000275148	0.573457
PC(16:1/20:4)	PC	0.00041666	0.577037
TG(51:4)	TG	0.0055322	0.582268
PC(18:3/18:3)	PC	0.000375262	0.587234
TG(52:1)	TG	0.0189353	0.589201
DG(36:4)	DG	0.0137424	0.590391
TG(51:3)	TG	0.000455148	0.596801
PE(P-18:1/0:0)	LPE	0.000859917	0.602816
TG(53:2)	TG	0.000428875	0.617166
TG(49:2)	TG	0.000198025	0.643486
PC(0:0/18:3)	LPC	0.00019354	0.644942
TG(48:0)	TG	0.00366201	0.648692
PC(38:5)	PC	4.15943e-07	0.655978
PC(15:0/22:6)	PC	2.66253e-05	0.66078
TG(47:1)	TG	0.000323071	0.669671
PC(0:0/17:0)	LPC	3.9543e-07	0.672952
SM(d18:2/20:0)	SM	3.5747e-06	0.67297
TG(48:1)	TG	0.00177706	0.69008
PC(18:1/0:0)	LPC	1.6622e-06	0.696315
TG(49:1)	TG	0.000647573	0.69826
PC(17:1/18:1)	PC	3.28462e-07	0.703739
PC(14:0/20:4)	PC	1.90718e-05	0.715851
PC(15:0/20:4)	PC	5.41907e-07	0.74755
Cer(d18:1/22:0)	Cer	1.4857e-06	0.753857
SM(31:1)	SM	1.31894e-05	0.761176
TG(47:2)	TG	2.73213e-05	0.762811
TG(45:0)	TG	2.21817e-05	0.770215
Cer(40:2)	Cer	9.04521e-05	0.780115
TG(48:3)	TG	0.00412781	0.789464
Cer(d18:1/23:0)	Cer	8.69787e-08	0.806911
PC(16:0/20:5)	PC	1.3097e-06	0.812533
TG(58:1)	TG	0.000114833	0.85038
TG(50:0)	TG	0.00137306	0.86295
PC(22:4/0:0)	LPC	3.10482e-05	0.873203
TG(49:0)	TG	5.13067e-05	0.889735
TG(45:1)	TG	6.4461e-06	0.901613
PC(20:5/0:0)	LPC	1.39198e-08	0.925018
TG(51:1)	TG	5.37454e-05	0.9459
PC(18:2/0:0)	LPC	7.45506e-11	0.961215
TG(50:5)	TG	0.00230843	0.977582
PC(37:5)	PC	5.46784e-10	0.979972
PC(20:3/0:0)	LPC	5.87778e-08	0.998084
TG(46:1)	TG	0.00156115	1.00163
Cer(d18:1/21:0)	Cer	8.90141e-08	1.02619
PC(16:0/17:0)	PC	1.07124e-10	1.0499
PC(22:5/0:0)	LPC	1.30644e-10	1.06149
TG(56:7)	TG	1.44495e-07	1.06932
TG(46:0)	TG	8.14323e-05	1.08021
PC(0:0/22:5)	LPC	1.77461e-12	1.08271
TG(53:1)	TG	0.000198381	1.16044
TG(56:1)	TG	0.00017407	1.16595
TG(46:2)	TG	0.000859136	1.20059
SM(43:2)	SM	1.32068e-09	1.20656
TG(47:0)	TG	7.36909e-10	1.22553
TG(54:0)	TG	2.3051e-06	1.30559
Cer(d43:1)	Cer	1.84842e-09	1.31171
PC(0:0/20:5)	LPC	1.62033e-10	1.31741
PC(17:0/20:4)	PC	2.59701e-12	1.33932
TG(54:1)	TG	0.00616056	1.34066
TG(44:0)	TG	3.33031e-05	1.51386
TG(52:0)	TG	3.41805e-05	1.60593
TG(44:1)	TG	0.000614552	1.97037
TG(42:0)	TG	0.000143431	2.78156
TG(40:0)	TG	0.000121293	3.12994

## Sheet: Supp. Tab. 4
			Concentration (ug/mL)
Metabolite	Equation	R-square	AV-HCC	CTRL	OB-MAFLD	MAFLD-HCC (DISCOVERY)	MAFLD (VAL)	MAFLD-HCC (VAL)#
AC(18:2n-6)	Y = -2.071*X + 1.140	0.03627	0.3188±0.04393	0.407±0.03285	0.4669±0.02273	0.8174±0.02869	0.640±0.217	0.02867±0.004295
Linoleic acid	Y = 63.50*X - 0.7825	0.7469	69.12±7.256	56.98±4.484	74.26±3.657	23.28±1.736	39.034±13.27	39.86±8.002
Docosapentaenoic acid	Y = 0.2222*X + 0.01720	0.8331	0.3055±0.03369	0.2546±0.0182	0.2532±0.01698	0.1183±0.006166	0.186±0.068	0.1745±0.02940
Palmitolinoleic acid	Y = 0.09445*X + 0.008943	0.9513	0.1322±0.01119	0.1115±0.01297	0.1271±0.006273	0.05007±0.003138	0.082±0.025	0.1195±0.02958
MUFA (14:1n-x)	Y = 0.2102*X + 0.2223	0.8924	1.432±0.1753	1.232±0.1685	1.011±0.08902	0.3785±0.01222	0.470±0.125	0.8421±0.1825
PUFA (14:2n-x)	Y = 0.4994*X + 0.9538	0.8863	3.148±0.4327	2.498±0.2186	1.794±0.1147	1.144±0.01998	1.39±0.238	2.584±0.5579
PUFA (16:3n-x)	Y = 0.02936*X + 0.003510	0.8544	0.1328±0.02028	0.07793±0.008977	0.06362±0.004715	0.01953±0.001532	0.033±0.011	0.04186±0.009171
Hydroxy-octadecadienoic acid	Y = 0.03322*X + 0.005443	0.8705	0.06478±0.01227	0.04753±0.005855	0.03853±0.001765	0.01865±0.0008762	0.041±0.016	0.04538±0.009287
PC(18:2/0:0)	Y = 0.3786*X + 0.008920	0.8244	0.2365±0.01256	0.2314±0.01836	0.2096±0.01245	0.452±0.02385	0.375±0.163	0.4968±0.06153
PC(0:0/22:5)	Y = 0.03056*X + 0.2379	0.1593	0.2783±0.003246	0.2886±0.00556	0.2814±0.002037	0.3235±0.004173	0.299±0.025	0.2220±0.02467

## Sheet: Supp. Tab. 5
Metabolite name	Metabolic class	Pearson R	FDR
AC(18:2n-6)	AC	-0.64023	1.1645e-22
AC(14:2n-x)	AC	-0.56256	6.4372e-17
AC(10:0)	AC	-0.44517	1.9787e-10
ChoE(22:6)	ChoE	-0.4413	3.013e-10
ChoE(20:4)	ChoE	-0.41391	4.3837e-09
ChoE(20:3)	ChoE	-0.37197	1.7711e-07
ChoE(18:1)	ChoE	-0.36029	4.3587e-07
ChoE(16:0)	ChoE	-0.35895	4.8475e-07
ChoE(18:2)	ChoE	-0.31708	1.1334e-05
PC(0:0/18:0)	LPC	-0.55451	1.9693e-16
PC(0:0/18:2)	LPC	-0.54976	3.9261e-16
PC(0:0/18:1)	LPC	-0.54646	6.0039e-16
PC(0:0/20:4)	LPC	-0.51629	4.065e-14
PC(22:6/0:0)	LPC	-0.47656	6.1117e-12
PC(O-24:1/0:0)	LPC	-0.47195	1.0277e-11
PC(20:0/0:0)	LPC	-0.45502	6.9799e-11
PC(20:1/0:0)	LPC	-0.45226	9.4608e-11
LPC(22:0)	LPC	-0.45107	1.0544e-10
PC(0:0/20:0)	LPC	-0.42825	1.1408e-09
PC(O-18:1/0:0)	LPC	-0.42345	1.7868e-09
PC(17:0/0:0)	LPC	-0.41162	5.2518e-09
LPC(O-22:2)	LPC	-0.40949	6.4418e-09
PC(16:0/0:0)	LPC	-0.40933	6.4828e-09
PC(O-24:2/0:0)	LPC	-0.39406	2.6962e-08
PC(O-22:1/0:0)	LPC	-0.39321	2.8428e-08
PC(O-20:2/0:0)	LPC	-0.39271	2.9552e-08
PC(0:0/16:0)	LPC	-0.39076	3.522e-08
PC(18:2/0:0)	LPC	-0.38958	3.901e-08
PC(P-18:1/0:0)	LPC	-0.38494	5.9086e-08
PC(20:4/0:0)	LPC	-0.38186	7.5769e-08
PC(O-20:1/0:0)	LPC	-0.38091	8.1281e-08
PC(P-20:2/0:0)	LPC	-0.37782	1.0678e-07
PC(O-22:0/0:0)	LPC	-0.36328	3.4721e-07
PC(18:0/0:0)	LPC	-0.35343	7.5915e-07
PC(0:0/22:6)	LPC	-0.34828	1.1513e-06
PC(0:0/20:1)	LPC	-0.34346	1.6545e-06
PC(0:0/17:1)	LPC	-0.32566	6.2276e-06
PC(16:1/0:0)	LPC	-0.31275	1.5335e-05
PC(P-20:1/0:0)	LPC	-0.31163	1.6509e-05
PE(22:6/0:0)	LPE	-0.52683	9.5086e-15
PE(0:0/18:2)	LPE	-0.48217	3.1794e-12
PE(0:0/18:1)	LPE	-0.41977	2.5343e-09
PE(0:0/20:4)	LPE	-0.38447	6.1137e-08
PE(0:0/22:6)	LPE	-0.35705	5.6483e-07
PE(0:0/20:3)	LPE	-0.34741	1.2275e-06
PE(P-18:2/0:0)	LPE	-0.34376	1.6266e-06
MUFA(14:1n-x)	MUFA	-0.55535	1.8498e-16
MUFA(16:1n-9)	MUFA	-0.48908	1.4109e-12
MUFA(24:1n-9)	MUFA	-0.43704	4.6948e-10
MUFA(18:1n-9)	MUFA	-0.39744	2.0056e-08
MUFA(20:1n-6)	MUFA	-0.36286	3.5499e-07
NAE(18:1n-9)	NAE	-0.48274	3.013e-12
NAE(16:0)	NAE	-0.36135	4.0102e-07
x-HODE	oxFA	-0.51031	9.0018e-14
PC(O-18:1/22:4)	PC	-0.5366	2.519e-15
PC(O-38:4)	PC	-0.47176	1.0349e-11
PC(P-16:0/18:1)	PC	-0.41167	5.2518e-09
PC(O-34:1)	PC	-0.39632	2.2128e-08
PC(O-18:1/18:2)	PC	-0.39486	2.5205e-08
PC(O-38:5)	PC	-0.39345	2.8193e-08
PC(18:0/20:4)	PC	-0.37078	1.9371e-07
PC(O-22:1/20:4)	PC	-0.36859	2.2938e-07
PC(O-18:2/20:4)	PC	-0.36708	2.5744e-07
PC(O-24:1/20:4)	PC	-0.34404	1.6016e-06
PC(P-16:0/18:2)	PC	-0.33248	3.7246e-06
PC(16:0/22:6)	PC	-0.32098	8.5632e-06
PI(18:0/20:4)	PI	-0.34149	1.8993e-06
PUFA(14:2n-x)	PUFA	-0.6365	2.17e-22
PUFA(20:4n-6)	PUFA	-0.58865	8.5188e-19
PUFA(16:3n-x)	PUFA	-0.57569	8.0232e-18
PUFA(18:2n-6)	PUFA	-0.55468	1.9693e-16
PUFA(22:6n-3)	PUFA	-0.54933	4.0648e-16
PUFA(22:5n-6)	PUFA	-0.54442	8.0139e-16
PUFA(16:2n-4,7)	PUFA	-0.53818	2.0363e-15
PUFA(16:3n-x)	PUFA	-0.44868	1.3677e-10
PUFA(22:4n-6)	PUFA	-0.40498	9.8868e-09
PUFA(18:3n-6)	PUFA	-0.38126	7.9384e-08
PUFA(20:3n-3)	PUFA	-0.34313	1.6876e-06
PUFA(22:5n-3)	PUFA	-0.33578	2.9028e-06
SFA(18:0)	SFA	-0.41304	4.7376e-09
SFA(16:0)	SFA	-0.30082	3.4871e-05
SM(d18:1/16:0)	SM	-0.45852	4.847e-11
SM(d18:2/16:0)	SM	-0.44611	1.8046e-10
SM(d18:1/22:0)	SM	-0.43654	4.8335e-10
SM(42:3)	SM	-0.4314	8.2424e-10
SM(d18:1/24:1) + SM(d18:2/24:0)	SM	-0.42547	1.4778e-09
SM(36:2)	SM	-0.41744	3.1189e-09
SM(d18:2/22:0)	SM	-0.40411	1.0678e-08
SM(42:1)	SM	-0.39984	1.6049e-08
SM(d18:1/18:0)	SM	-0.367	2.5744e-07
SM(38:1)	SM	-0.3652	2.966e-07
SM(d18:2/23:0)	SM	-0.363	3.5318e-07
SM(d18:0/16:0)	SM	-0.3253	6.3561e-06
androsterone sulfate + etiocholanolone sulfate	ST	-0.4758	6.602e-12
isomer androsterone sulfate	ST	-0.46771	1.6692e-11
isomer pregn-5-ene-3,20-diol sulfate	ST	-0.45635	6.0624e-11
Dehydroepiandrosterone sulfate (DHEAS)	ST	-0.36691	2.5756e-07
isomer Dehydroepiandrosterone sulfate (DHEAS)	ST	-0.33692	2.6713e-06
Cortisol (hydrocortisone)	ST	-0.32273	7.6569e-06
TG(58:9)	TG	-0.30664	2.3384e-05
Taurocholic acid	BA	0.32261	7.6787e-06
Cer(d43:1)	Cer	0.38621	5.2965e-08
ChoE(22:5)	ChoE	0.41285	4.7806e-09
CMH(d18:1/22:0)	CMH	0.33994	2.1332e-06
DG(32:1)	DG	0.51857	3.0044e-14
PC(22:5/0:0)	LPC	0.37064	1.9451e-07
PC(0:0/18:3)	LPC	0.37158	1.8189e-07
PC(0:0/22:5)	LPC	0.43357	6.5985e-10
PC(18:2/0:0)	LPC	0.45116	1.0544e-10
PC(18:0/22:5)	PC	0.31392	1.4175e-05
PC(38:5)	PC	0.34171	1.8774e-06
PC(16:0/19:1)	PC	0.37328	1.5894e-07
PC(34:3)	PC	0.414	4.3837e-09
PC(37:5)	PC	0.42766	1.1996e-09
PC(14:0/14:0)	PC	0.43989	3.4748e-10
PC(32:1)	PC	0.49725	5.0154e-13
PC(33:1)	PC	0.52727	9.1342e-15
PC(30:0)	PC	0.53149	5.1473e-15
PC(16:0/17:0)	PC	0.57056	1.8415e-17
PE(O-16:0/18:1)	PE	0.3934	2.8193e-08
PE(20:5/16:0)	PE	0.42209	2.0369e-09
PI(16:0/18:2)	PI	0.32253	7.679e-06
TG(53:3)	TG	0.33914	2.2577e-06
TG(51:4)	TG	0.36827	2.3395e-07
TG(52:4)	TG	0.37043	1.9668e-07
TG(50:4)	TG	0.38271	7.0718e-08
TG(55:4)	TG	0.38367	6.5269e-08
TG(60:2)	TG	0.41266	4.8241e-09
TG(58:5)	TG	0.41769	3.0745e-09
TG(50:5)	TG	0.4193	2.6314e-09
TG(50:3)	TG	0.42002	2.4981e-09
TG(58:2)	TG	0.42431	1.6509e-09
TG(56:2)	TG	0.42634	1.3645e-09
TG(56:7)	TG	0.43691	4.703e-10
TG(55:3)	TG	0.45736	5.4738e-11
TG(52:1)	TG	0.45941	4.4337e-11
TG(53:2)	TG	0.47485	7.3016e-12
TG(45:0)	TG	0.47803	5.1736e-12
TG(50:1)	TG	0.48099	3.627e-12
TG(51:3)	TG	0.48451	2.4479e-12
TG(54:0)	TG	0.48492	2.369e-12
TG(58:1)	TG	0.49411	7.4527e-13
TG(54:1)	TG	0.49781	4.7456e-13
TG(50:2)	TG	0.50706	1.3821e-13
TG(56:1)	TG	0.51507	4.7221e-14
TG(52:0)	TG	0.52084	2.2191e-14
TG(48:3)	TG	0.52758	8.9552e-15
TG(55:2)	TG	0.53485	3.1945e-15
TG(50:0)	TG	0.54794	4.9027e-16
TG(42:0)	TG	0.55408	2.0364e-16
TG(51:2)	TG	0.55684	1.5125e-16
TG(48:0)	TG	0.55884	1.1377e-16
TG(44:0)	TG	0.56261	6.4372e-17
TG(46:2)	TG	0.58873	8.5188e-19
TG(48:2)	TG	0.59095	6.2769e-19
TG(49:0)	TG	0.59364	4.0735e-19
TG(53:1)	TG	0.5944	3.7754e-19
TG(44:1)	TG	0.59888	1.7591e-19
TG(46:0)	TG	0.6026	9.3787e-20
TG(49:3)	TG	0.60965	2.622e-20
TG(45:1)	TG	0.61003	2.622e-20
TG(46:1)	TG	0.61076	2.5322e-20
TG(48:1)	TG	0.61991	4.5734e-21
TG(51:1)	TG	0.62753	1.0793e-21
TG(47:2)	TG	0.62811	1.0793e-21
TG(49:2)	TG	0.64297	8.0019e-23
TG(49:1)	TG	0.64305	8.0019e-23
TG(47:1)	TG	0.64677	6.9066e-23
TG(47:0)	TG	0.66645	1.4559e-24
