# Supplementary material for: Serum lipidomics as diagnostic potential for metabolic-associated hepatocellular carcinoma
Source: Research Square preprint supplement (doi:10.21203/rs.3.rs-140974/v1), 2021-01-18

A

Predictive accuracies with different features

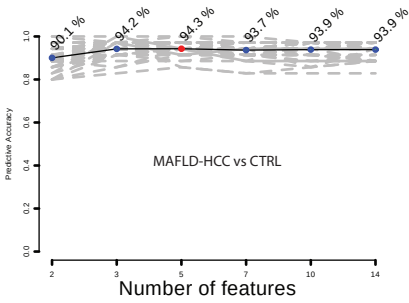

Predictive accuracies with different features

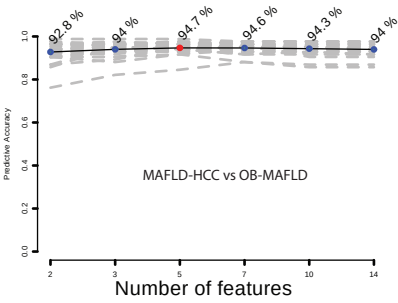

Predictive accuracies with different features

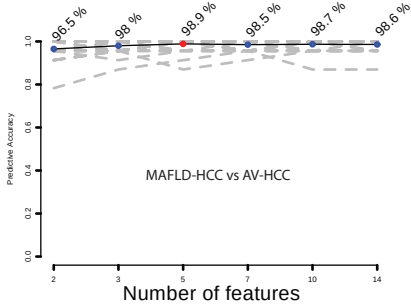

B

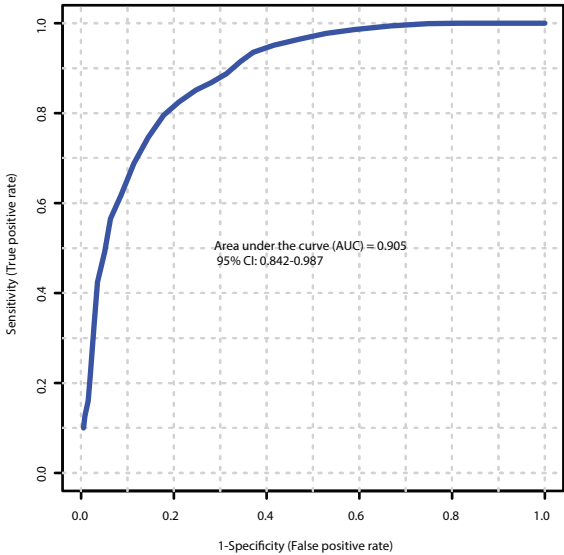

Supplement: Supplementary file 2 [file eb308eb1d419b1fadc1c2f54.pdf]
